1 **FC MEDIATED PAN-SARBECOVIRUS PROTECTION AFTER ALPHAVIRUS VECTOR**  
2 **VACCINATION**

3 Lily E. Adams<sup>1</sup>; Sarah R. Leist<sup>2</sup>; Kenneth H. Dinnon III<sup>1</sup>; Ande West<sup>2,4</sup>; Kendra L. Gully<sup>2,3</sup>;  
4 Elizabeth J. Anderson<sup>3</sup>; Jennifer F. Loomer<sup>1</sup>; Emily A. Madden<sup>1</sup>; John M. Powers<sup>2</sup>; Alexandra  
5 Schäfer<sup>2</sup>; Sanjay Sarkar<sup>4</sup>; Izabella N. Castillo<sup>1</sup>, Jenny S. Maron<sup>7</sup>; Ryan P. McNamara<sup>7</sup>; Harry L.  
6 Bertera<sup>7</sup>; Mark R. Zweigert<sup>2</sup>; Jaclyn S. Higgins<sup>1</sup>; Brea K. Hampton<sup>4</sup>; Lakshmanane Premkumar<sup>1</sup>;  
7 Galit Alter<sup>7</sup>; Stephanie A. Montgomery<sup>5,8</sup>; Victoria K. Baxter<sup>3,5+</sup>; Mark T. Heise<sup>1,4,6+\*</sup>; and Ralph S.  
8 Baric<sup>1,2,6+\*</sup>

9 <sup>1</sup>Department of Microbiology & Immunology, <sup>2</sup>Department of Epidemiology, <sup>3</sup>Division of  
10 Comparative Medicine, <sup>4</sup>Department of Genetics, <sup>5</sup>Department of Pathology and Laboratory  
11 Medicine, <sup>6</sup>Rapidly Emerging Antiviral Drug Discovery Initiative, University of North Carolina at  
12 Chapel Hill, Chapel Hill, NC, USA.

13 <sup>7</sup>Ragon Institute of MGH, MIT, and Harvard University, Cambridge, MA, USA

14 <sup>8</sup>Dallas Tissue Research, Dallas, TX, USA

15 +Senior author. \*Corresponding author.

16 **ABSTRACT**

17 Two group 2B  $\beta$ -coronaviruses (sarbecoviruses) have caused regional and global epidemics in  
18 modern history. The mechanisms of cross protection driven by the sarbecovirus spike, a  
19 dominant immunogen, are less clear yet critically important for pan-sarbecovirus vaccine  
20 development. We evaluated the mechanisms of cross-sarbecovirus protective immunity using a  
21 panel of alphavirus-vectored vaccines covering bat to human strains. While vaccination did not  
22 prevent virus replication, it protected against lethal heterologous disease outcomes in both  
23 SARS-CoV-2 and clade 2 bat sarbecovirus HKU3-SRBD challenge models. The spike vaccines  
24 tested primarily elicited a highly S1-specific homologous neutralizing antibody response with no  
25 detectable cross-virus neutralization. We found non-neutralizing antibody functions that  
26 mediated cross protection in wild-type mice were mechanistically linked to Fc $\gamma$ R4 and spike S2-  
27 binding antibodies. Protection was lost in FcR knockout mice, further supporting a model for  
28 non-neutralizing, protective antibodies. These data highlight the importance of FcR-mediated  
29 cross-protective immune responses in universal pan-sarbecovirus vaccine designs.

30 **INTRODUCTION**

31 Three  $\beta$ -coronaviruses ( $\beta$ CoVs) have caused epidemic and pandemic disease in human  
32 populations in the 21<sup>st</sup> century. The 2002-2004 severe acute respiratory coronavirus (SARS-  
33 CoV) and the 2019 SARS-CoV-2 (the causative agent of the COVID-19 pandemic) viruses  
34 represent prototype clade 1a and clade 1b group 2B  $\beta$ CoVs, which belong to the subgenus  
35 sarbecoviruses. SARS-CoV and SARS-CoV-2 likely emerged from bat reservoirs either through  
36 intermediate host transmission events or through direct spread into human populations (1, 2).  
37 The subgenus sarbecovirus includes other highly heterogeneous epidemic, pandemic, and  
38 zoonotic strains poised for emergence and cross-species transmission to novel mammalian  
39 hosts. Other sarbecoviruses identified in bat or mammalian reservoirs, including SHC014 and  
40 WIV1, can use human ACE2 receptors for entry and replicate efficiently in primary human cells  
41 (3–11). Due to global efforts, safe and effective vaccines against SARS-CoV-2 are approved for  
42 use (12–14) and next-generation vaccines including those vectored by alphaviruses are under  
43 development (15–17). The accelerated approval of SARS-CoV-2 vaccines is the result of  
44 decades of basic and applied research (12). However, current SARS-CoV-2 spike-based  
45 vaccines provide limited protection against heterologous bat sarbecoviruses, as well as recently  
46 emerged SARS-CoV-2 variants of concern (VOC) (18). The extent and complex immunologic  
47 mechanisms regulating cross protection against closely related and distant strains remains  
48 poorly understood but is critical for pan-coronavirus vaccine design, human health, and public  
49 health preparedness.

50 The sarbecovirus spike glycoprotein is a class I viral fusion protein roughly 1,300 amino acids in  
51 length that trimerizes upon folding. Spike is divided into an amino-terminal S1 subunit,  
52 containing the receptor-binding domain, and a carboxy-terminal S2 subunit, driving membrane  
53 fusion. The S1 subunit is further subdivided into a highly variable N-terminal domain (NTD) and  
54 a receptor binding domain (RBD), which engages the ACE2 receptor. Subtle molecular  
55 communication networks across domains are thought to influence epitope presentation, as  
56 evidenced by druggable targets in the NTD that interrupt distal RBD interactions with ACE2 as  
57 well as the identification of spike mutations outside of the RBD that stabilize receptor interaction  
58 (19, 20). As such, structural features of the spike are likely to impact vaccine cross-protection.  
59 Recent work has characterized the immune response against distinct Sarbecovirus spike  
60 proteins following homologous or heterologous vaccination (21–24). Cross-reactive T cells and  
61 antibodies recognize broadly conserved epitopes across SARS-CoV-2, other sarbecoviruses,  
62 and endemic (common-cold)  $\beta$ -coronaviruses. However, the role of these epitopes in protective  
63 immunity remains a subject of rigorous investigation (22, 25, 26). After SARS-CoV-2 natural  
64 infection or vaccination, the spike RBD, NTD, and S2 domains stimulate neutralizing and non-

65 neutralizing antibody responses. Among sarbecoviruses, potent, broadly protective, neutralizing  
66 antibodies primarily target specific epitopes in the RBD and S2 portions of the spike  
67 glycoprotein (23, 27–32), typically targeting epitope bins RBD-6 and RBD-7 (33, 34). However,  
68 neutralizing antibody activity and function have not been correlated, as it is sometimes difficult  
69 to predict whether potent cross-reactive neutralizing antibodies that target spike will sufficiently  
70 protect *in vivo* (34). Although less widely studied, several studies have shown that antibody  
71 FcR-mediated effector functions are critical in protective immunity (35–39). Fc receptors have  
72 high affinity for IgG subtypes and are cell surface receptors on monocytes, macrophages, and  
73 neutrophils; FcR recognition of the antibody Fc region stimulates effector cell function like NK  
74 cell-mediated lysis, neutrophil degranulation, and ADCP (40). Thus, FcR effector function may  
75 be a key correlate for next generation vaccine development and improvement.

76 Here, we utilized a Venezuelan equine encephalitis virus 3526 replicon particle (VRP3526) (41)  
77 as a platform to evaluate mechanisms of cross protection after pandemic and pre-emergent  
78 coronavirus spike glycoprotein vaccination in mice, followed by lethal SARS-CoV-2 challenge  
79 (42). VRP vectors induce robust cellular and humoral immune responses after vaccination and  
80 VRP spike vaccines protect against SARS-CoV and SARS-CoV-2 *in vivo* (43, 44). In the  
81 present study, contemporary human coronavirus spikes elicited no protection against weight  
82 loss, mortality, or virus replication after SARS-CoV-2 challenge. While VRP delivered  
83 homologous SARS-CoV-2 spike vaccines protected against weight loss, lethal disease, and  
84 virus replication after homologous challenge, heterologous VRP sarbecovirus spike vaccines  
85 conferred cross protection against weight loss and death, but provided limited reductions in  
86 SARS-CoV-2 MA10 replication in young and aged animals. While homologous protection  
87 correlated with potent neutralizing antibody responses that principally targeted the S1  
88 subdomains, no cross-neutralizing antibodies were detected against the heterologous  
89 sarbecovirus strains. Rather, systems serology (45), *in vitro* studies, and passive antibody  
90 transfer experiments in wild-type and Fc-receptor deficient mice implicated an FcR-driven  
91 mechanism targeting S2, such as antibody-dependent cellular phagocytosis (ADCP). These  
92 results build support for universal sarbecovirus vaccine designs that include FcR-mediated  
93 cross protection, coupled with potent cross-neutralizing antibody responses.

## 94 **RESULTS**

95 **Venezuelan equine encephalitis virus replicon particle assembly produced high titer**  
96 **vaccines to potently express coronavirus spike proteins *in vivo***

97 Venezuelan equine encephalitis virus 3526 replicon particles (VRPs) are BSL2, non-select,  
98 replication-deficient vectors derived from a live attenuated strain (41). They are assembled  
99 using a tripartite RNA-based assembly scheme (**Fig. 1A**), thus generating a self-amplifying,  
100 single cell hit RNA vaccine platform. We generated replicon particles (VRPs) expressing spike  
101 proteins from several  $\alpha$ - and  $\beta$ -CoVs that included three common-cold CoVs, OC43, NL63, and  
102 HKU1 (**Fig. 1B, green**), as well as pandemic (SARS-CoV, SARS-CoV-2) and pre-emergent  
103 sarbecoviruses circulating in animal reservoirs (RaTG13, HKU3, WIV1, SHC014) (**Fig. 1B, red**).  
104 The sarbecovirus spike proteins were separated into three groups based on amino acid  
105 similarity: clade 1a (SARS-CoV, SHC014, WIV1), 2 (HKU3), and 1b (SARS-CoV-2, RaTG13)  
106 (**Fig. 1A**) (46). The clade 1b virus RaTG13 spike protein is 97.4% identical to the SARS-CoV-2  
107 spike protein, the clade 2 virus HKU3 spike protein shares 75.8% identity to the SARS-CoV-2  
108 spike protein, and the clade 1a virus spike proteins share 75.6-78.6% identity to the SARS-CoV-  
109 2 spike protein. Clade 2 HKU3 spike protein shares 78.1-78.8% identity to the clade 1a spike  
110 proteins (**Table 1**). All VRP preparations achieved particle titers exceeding  $2 \times 10^6$  IU/mL,  
111 sufficient for vaccination in a mouse model (**Fig. 1C**) (41). Immunofluorescent staining for the  
112 highly conserved spike S2 domain verified spike expression in mammalian cells infected by  
113 VRPs (**Fig. 1D**).

#### 114 **VRP-vectored sarbecovirus spike proteins protect against severe SARS-CoV-2 disease in** 115 **young mice**

116 To test the VRP 3526 platform and evaluate the capacity for spike protein elicited cross-  
117 protection, we utilized a lethal mouse model for SARS-CoV-2 disease. Groups ( $n = 8-10$ ) of 8-  
118 10 week aged female BALB/cAnNHsd (BALB/c) mice were vaccinated with a low dose of  $2 \times 10^4$   
119 IU VRP encoding each of the different spike vaccines by footpad injection then boosted on day  
120 21 with the homologous spike VRP. At 21 days post-boost, (now 14-16 week aged) BALB/c  
121 mice were challenged with  $10^4$  PFU SARS-CoV-2 MA10 (42) intranasally. Virus titer after  
122 challenge is a sensitive measure of vaccine performance, and reductions in titer are often  
123 correlative to vaccine efficacy (12, 47). However, only the VRP SARS-CoV-2 spike vaccine  
124 elicited nearly complete protection from homologous virus replication. In contrast, the clade 1b  
125 VRP RaTG13 spike vaccination resulted in slight, but significant reductions in virus titers on day  
126 2 (1 log reduction, 10-fold) and 5 (3 log reduction, 1,000-fold) post infection, as compared to the  
127 GFP vaccinated controls. In animals vaccinated with clade 2 VRP HKU3 spike, SARS-CoV-2  
128 MA10 titers were significantly reduced by about 1.5 and 3 logs (~30- and 1,000-fold) on days 2  
129 and 5 post infection, compared to GFP control vaccinated animals. We also saw slight, but

130 significant, reductions in virus titers in mice vaccinated with highly heterogeneous clade 1a  
131 strains (SARS-CoV, WIV1 and SHC014) on day 2. However, titers were reduced by about 2  
132 logs on day 5 post infection (**Fig. 2A**).

133 Consistent with VRP vaccine effects on viral replication, we observed a range of protection  
134 outcomes following virus challenge. Bronchoconstriction and airway resistance in the lungs of  
135 challenged mice are a representative disease metric measured by whole-body plethysmography  
136 that mirrors disease in humans (48). Using this method, we tracked respiratory function through  
137 the duration of the experiment and analyzed the overall difference in lung function between  
138 vaccine groups via area under the curve calculations. Overall, we found that clade 1b and clade  
139 2 vaccines effectively protected against bronchoconstriction (R<sub>p</sub>ef) and airway resistance  
140 (PenH) after SARS-CoV-2 MA10 challenge (**Fig. 2B**), accordant with reduced clinical disease.  
141 In contrast, clade 1a vaccinated animals had significantly increased respiratory dysfunction and  
142 clinical disease when compared to uninfected controls, indicating reduced protection. As  
143 additional measures of disease severity, we monitored weight loss and assessed lung pathology  
144 by scoring gross discoloration (GLD), diffuse alveolar damage (DAD), and acute lung injury  
145 (ALI) following SARS-CoV-2 challenge. Homologous SARS-CoV-2 challenge in VRP SARS-  
146 CoV-2 spike vaccinated animals resulted in minimal weight loss (**Fig. 2C**) and GLD (**Fig. 2F**),  
147 and as such animals were fully protected against significant SARS-CoV-2 disease. In contrast,  
148 the other zoonotic and pandemic CoV spike proteins partially protected from clinical disease  
149 compared to controls. For example, the clade 1b CoV spike proteins protected against severe  
150 SARS-CoV-2 disease, resulting in little (~10%-RaTG13) to no measurable weight loss (SARS-  
151 CoV-2) and minimal GLD at the time of tissue harvest (**Fig. 2C, F**). Under identical conditions,  
152 clade 1a spike (SARS-CoV, WIV1 and SHC014) vaccines elicited low level intermediate  
153 protection after SARS-CoV-2 MA10 challenge, resulting in more weight loss, ranging between  
154 10-15% body weight lost, and notable increases in GLD (**Fig. 2E, F**). Despite being as distant  
155 as the clade 1a CoV spikes were from the SARS-CoV-2 spike (Table 1), the clade 2 HKU3  
156 spike vaccine elicited near full protection against disease with ~5% weight loss and minimal  
157 lung discoloration at tissue harvest (**Fig. 2D, F**). In addition to antigenic distance, the HKU3  
158 spike protein also contains deletions in both the NTD and RBD when compared to the SARS-  
159 CoV-2 spike protein (**Fig. S1**). Thus, the protection elicited by VRP HKU3 spike after SARS-  
160 CoV-2 heterologous challenge is particularly noteworthy. Within vaccine groups where mice  
161 were partially protected from disease, such as WIV1 spike vaccine, disease outcomes ranged  
162 from mild disease (mild weight loss and lung discoloration) to severe disease (significant weight  
163 loss and severe lung discoloration), suggesting that this protective mechanism is subject to

164 strain-specific variation, resulting in highly variable disease outcomes. Overall, we calculated a  
165 robust negative correlation coefficient (-0.76) between disease metrics of GLD and area under  
166 the curve of percent body weight as well as a strong positive correlation (0.72) between virus  
167 titers day 2 and day 5 post infection. The slight, but incomplete, reduction in virus titer suggests  
168 that protection was likely not mediated by the presence of potent cross-neutralizing antibodies  
169 with the ability to prevent infection. However, we calculated a negative correlation coefficient (-  
170 0.68) between viral titer two days post infection and disease severity as measure by area under  
171 the curve of percent body weight through the duration of the study, indicating virus titer may still  
172 be predictive of disease severity in our model.

173 Consistent with prior established work (42), histological examination (**Fig. 2G, H**) of lung  
174 sections stained for hematoxylin and eosin at 5 days post infection identified regions of severe  
175 disease in mock vaccinated, infected animals, including infiltration of neutrophils in the  
176 interstitial and alveolar spaces, alveolar septal thickening, cell sloughing and proteinaceous  
177 debris in the airspaces, and hyaline membrane formation (**Fig. 2I**). Using previously described  
178 scoring metrics for diffuse alveolar damage (DAD) and acute lung injury (ALI), histologic  
179 sections revealed large numbers of infiltrating immune cells, increased membrane thickness,  
180 and proteinaceous debris in the airspaces (42) (**Fig. 2I, red, blue, black**). Consistent with other  
181 metrics reported in this study (e.g. weight loss), mice vaccinated with the homologous spike  
182 demonstrated protection from SARS-2-induced lung pathology, with baseline-equivalent DAD  
183 and ALI scores (41) (**Fig. 2G, H, I**). Heterologous vaccines that were associated with greater  
184 GLD scores and thus only partial protection (e.g. WIV1) demonstrated more severe tissue  
185 damage and higher DAD and ALI scores. Vaccines that were more protective (e.g. HKU3)  
186 resulted in lower DAD and ALI scores comparable to the SARS-2 vaccinated group.

187 We also used our SARS-CoV-2 mouse lethal challenge model to evaluate whether vaccination  
188 with VRPs expressing spikes of contemporary common cold human  $\beta$ -CoV, which share  
189 conserved S2 epitopes with epidemic and pre-emergent  $\beta$ -CoV (49, 50) would protect against  
190 SARS-CoV-2 disease. We found that single exposures (single component, two doses) of  
191 contemporary human coronavirus spike proteins did not protect against severe SARS-CoV-2  
192 disease and mortality in young mice (**Fig. S2 A, C**), nor did these vaccines reduce viral  
193 replication efficiency (**Fig. S2 B**). In contrast to the Group 2B coronavirus vaccinated mice, a  
194 large percentage (>50% in most cases) of common cold spike vaccinated mice died when  
195 compared to those vaccinated with VRP SARS-CoV-2 spike (**Fig. S2 C**).

196 Evaluating the potential for aberrant immunity after vaccination is especially important as  
197 killed/inactivated CoV vaccines have been reported to induce a pro-inflammatory and Th2  
198 skewed immune response, commonly associated with immune pathology (47, 51). Using a  
199 BioPlex Cytokine Immunoassay, we measured the cytokine responses after challenge in  
200 vaccinated mice on days 2 and 5 post infection. In groups that received heterologous VRP spike  
201 vaccines, we did not detect elevated Th2 cell cytokine signatures (IL-4, IL-5, IL-13), rather VRP  
202 vaccines elicited a strong Th1 signature (IL-12, TNF- $\alpha$ , IFN- $\gamma$ ) which is commonly associated  
203 with a protective immune response (41). Additionally, in contrast to the groups vaccinated with  
204 the homologous SARS-CoV-2 spike, groups vaccinated with the heterologous sarbecovirus  
205 VRP spikes demonstrated elevated pro-inflammatory cytokine responses in the lung two days  
206 post-SARS-CoV-2 MA10 challenge (IL-1 $\beta$ , IFN- $\gamma$ , TNF- $\alpha$ , IL-6) (**Fig. S3**). Altogether, this  
207 suggests the VRP sarbecovirus spike vaccines elicited a protective immune response against  
208 SARS-CoV-2 infection.

### 209 **VRP-vectored sarbecovirus spike proteins protect against severe SARS-CoV-2 disease in** 210 **old mice**

211 To test the efficacy of the VRP platform and evaluate the potential for cross-protection in an  
212 aging population, we utilized the SARS-CoV-2 MA10 lethal challenge model in aged (1-year old)  
213 mice. Mice were immunized with  $2 \times 10^4$  IU VRP by footpad inoculation following a prime/boost  
214 schedule on days 0 and 21. Three weeks post boost, mice were challenged with  $10^3$  PFU ( $\sim 1$   
215 LD<sub>50</sub>, typically 50% mortality) SARS-CoV-2 MA10 intranasally (**Fig. 3A-F**). We observed near  
216 complete protection in our homologous vaccinated, aged mouse model, as animals challenged  
217 with SARS-CoV-2 MA10 experienced  $\sim 5\%$  weight loss before recovery (**Fig. 3A**). Importantly,  
218 VRP SARS-CoV-2 spike vaccinated animals were also significantly protected from GLD upon  
219 tissue harvest on days 2 and 5 post infection (**Fig. 3D**). Moreover, virus titers were reduced by 5  
220 and 3 logs on day 2 and 5 post infection, a significant reduction when compared to controls  
221 (**Fig. 3E**). In contrast, clade 1b VRP RaTG13 spike vaccinated animals showed some protection  
222 from clinical disease as measured by limited weight loss ( $\sim 8\%$ ) and GLD on days 2 and 5 post  
223 infection, as compared to mock vaccinated controls (**Fig. 3A, D**). Clade 2 VRP HKU3 spike  
224 vaccinated animals also showed limited weight loss ( $\sim 10\%$ ), GLD, and slight reduction in virus  
225 titer on days 2 and 5 post infection, which were significantly different from controls. Clade 1a  
226 VRP spike vaccines elicited significant but variable levels of protection in the aged mouse model  
227 after SARS-CoV-2 MA10 challenge (**Fig. 3B, D**). Based on protection from weight loss and lung  
228 discoloration scores, clade 1a VRP vaccines were protective when compared to mock

229 vaccinated controls on days 2 and 5 post infection (**Fig. 3C, D**). However, clade 1a vaccines  
230 did not protect against virus replication on day 2, as modest but not significant ~1 log reductions  
231 were noted in VRP WIV1 and VRP SHC014 vaccinated animals on day 5. Reductions in  
232 respiratory function generally correlated with overall disease severity, as measured by weight  
233 loss and GLD (**Fig. 3F**). Compared to young mice, SARS-CoV-2 replicated to higher titers in  
234 the lungs of the old mice with more breakthrough replication in the homologous vaccinated mice  
235 (**Fig. 3E**).

236 As aged animals are significantly more vulnerable to higher SARS-CoV-2 MA10 challenge  
237 doses (42), we next determined if the VRP sarbecovirus spike vaccine panel could protect  
238 against a 10-fold higher,  $10^4$  challenge dose, which typically results in 85% mortality. Mice  
239 vaccinated with VRP SARS-CoV-2 spike were fully protected from severe disease and mortality  
240 through day 5 post infection. In contrast, mice vaccinated with other clade 1a, 1b, or clade 2  
241 heterologous VRP spike vaccines experienced equivalent weight loss as mock vaccinated  
242 controls (**Fig. S4**) and mortality rates of 25-75% (**Fig. 3G**), indicating the cross-protection  
243 elicited in our model has dramatic potential to vary in an aging population, especially as a  
244 function of infectious dose.

#### 245 **VRP SARS-CoV-2 spike protects against disease in heterologous sarbecovirus infection**

246 The clade 2 HKU3 strain cannot infect primate cells and does not use an ortholog human, civet,  
247 select bat, or mouse ACE2 receptor for docking and entry (11). However, more recent studies  
248 suggest that some clade 2 strains can utilize bat ACE2 molecules for entry if isolated from their  
249 natural bat host species (52), which suggests clade 2 sarbecoviruses may become an emergent  
250 threat in the future. Although the HKU3 spike is phylogenetically distant from clade 1 strains  
251 (**Table 1**), vaccination elicited a good protective profile against SARS-CoV-2 MA10 (**Fig. 2**). As  
252 HKU3 could emerge by mutation or RNA recombination, we next evaluated whether the VRP  
253 SARS-CoV-2 spike vaccine would protect against clade 2 heterologous challenge. 8-10 week  
254 old mice were vaccinated and boosted with VRP HKU3, VRP SARS-CoV-2, and VRP GFP  
255 vaccines as previously described. Vaccinated mice were then infected intranasally with the  
256 mouse-adapted clade 2 bat sarbecovirus designated HKU3-SRBD MA, a virus that can infect  
257 mammalian cells and cause disease in mice (11, 53). The homologous HKU3 vaccinated  
258 animals were fully protected from weight loss, GLD, and showed a significant 4-log reduction in  
259 titer after HKU3-SRBD challenge (**Fig. 4A-C**). In contrast, the heterologous VRP SARS-CoV-2  
260 vaccine attenuated HKU3-SRBD disease severity as evidenced by ~15% body weight loss (**Fig.**  
261 **4A**), a recovery of body weight after 3 days, and modest reductions in GLD scores when



262 compared to mock vaccinated animals (**Fig. 4B**). Modest but significant ~5- and 10-fold  
263 reductions in virus titer were also noted on days 2 and 5 post infection, respectively, in VRP  
264 SARS-CoV-2 vaccinated mice when compared to VRP GFP vaccinated control (**Fig. 4C**). As  
265 such, we observed a cross-protective phenotype mediated by VRP spike vaccines in two unique  
266 challenge models, prompting further mechanistic investigation.

### 267 **VRP spike vaccinations induce non-neutralizing, cross-reactive antibodies**

268 Each VRP spike vaccine elicited a potent serologic IgG response against the SARS-CoV-2  
269 spike protein (**Fig. 5A, left**). Total IgG titers ranged from  $1 \times 10^4$  to  $5 \times 10^4$ . The VRP spike  
270 vaccines also elicited a potent IgG response against the SARS-CoV-2 receptor binding domain  
271 (RBD, **Fig. 5A, middle**), though at about a two-fold reduction in potency. Additionally, mice  
272 vaccinated with VRP RaTG13 did not produce significant IgG against the SARS-CoV-2 RBD,  
273 despite inducing notable IgG against the SARS-CoV-2 N-terminal domain, comparable to the  
274 homologous VRP SARS-CoV-2 vaccine (NTD, **Fig. 5A, right**). The NTD is fairly well conserved  
275 between SARS-CoV-2 and RaTG13 (98.3% amino acid identity), while the RBD is more  
276 diverged (89.3%, more divergence in the receptor-binding motif), so these results were not  
277 unexpected. After VRP vaccination (**Fig. 5B**), we detected a strong IgG2a skew in antibody  
278 titers in VRP spike antigen-vaccinated mice, but not in GFP control vaccinated mice, indicating  
279 that vaccination with the sarbecovirus spikes induced a protective Th1 response (54). We also  
280 observed a marked vaccine antigen specific grouping in the ratio of IgG2a to IgG1; for example,  
281 the VRP SARS-CoV-2 vaccine (blue) elicited a more IgG2a skewed antibody response against  
282 the SARS-CoV-2 spike protein than the VRP RaTG13 vaccine (red). Further analyses  
283 demonstrated high reactivity towards full-length spike with little-to-no preference for IgG2a  
284 recognition of S1 or S2 (**Fig. 5C**). Given the presence of cross-reactive antibody responses  
285 elicited by VRP-spike vaccines, we then tested the neutralizing antibody response in a series of  
286 live-virus assays. Overall, we detected neutralizing antibodies only in the homologous VRP  
287 SARS-CoV-2 vaccine group with an  $IC_{50}$  of ~1:700 but did not detect any cross-neutralizing  
288 antibody responses between any of the other VRP vaccine groups and luciferase reporter  
289 SARS-CoV-2, except for some low-level SARS-CoV-2 neutralizing titers in a subset of VRP  
290 RaTG13 vaccinated animals (**Fig. 5D**). Additionally, VRP SHC014 sera neutralized reporter  
291 virus SHC014 with an  $IC_{50}$  of ~1:800 (**Fig. 5F**), but there was also no detectable neutralization of  
292 the SHC014 virus by VRP SARS-CoV-2 sera.

293 Using a luciferase reporter system to detect spike NTD, RBD and S1 domain-specific  
294 neutralizing antibodies (18, 34), we determined that the majority of VRP SARS-CoV-2 spike

295 neutralizing antibodies targeted the RBD (amino acids 332-528) and the C-terminal segment of  
296 S1 (RBD+, amino acids 332-685). Additionally, despite clear evidence of at least 4 neutralizing  
297 epitopes in the N-terminal domain (NTD, amino acids 13-305) (33), the VRP SARS-CoV-2 spike  
298 vaccines failed to elicit measurable neutralizing antibody titers against the SARS-CoV-2 NTD or  
299 S2 domain (**Fig. 5E**). We also mapped the domain specific neutralizing antibody responses  
300 elicited by animals vaccinated with the VRP SHC014 spike. In this loss of function assay, VRP  
301 SHC014 spike elicited neutralizing antibodies preferentially targeted the NTD and RBD+  
302 regions. The complete loss of neutralization was noted when larger segments of the spike  
303 protein were exchanged in the reporter system – either RBD+ or the region spanning from the  
304 beginning of the NTD to the end of the RBD (NTD-RBD, amino acids 13-528). This also  
305 indicates that SHC014 homologous neutralizing antibodies preferentially target highly specific  
306 epitopes in the SHC014 spike S1 region (**Fig. 5G**). Our data suggests that neutralizing antibody  
307 responses elicited by VRP spike vaccines are highly type-and domain-specific, supporting the  
308 hypothesis that cross-neutralizing antibodies do not drive VRP cross-protection between  
309 sarbecoviruses.

310 Given the inconsistency between neutralizing antibodies and cross protection, we further  
311 employed systems serology to characterize the overall humoral architecture in response to our  
312 VRP candidates (37, 45) (**Fig. S5**). An initial multivariate analysis (partial least squares  
313 discriminant analysis, or PLS-DA) demonstrated a strong clustering of challenged animals away  
314 from baseline for both Fab (**Fig. 5H**) and FcR (**Fig. 5J**) binding antibodies. Individual features  
315 that separated groupings were identified. Interestingly, Fc-mediated, non-neutralizing functions  
316 such as antibody dependent complement deposition (ADCD) and antibody-dependent cellular  
317 phagocytosis (ADCP) were among the highest ranked. We validated this through clustering  
318 these functional assays with both Fab and FcR binding profiles (**Fig. 5I, K**). Similar to our  
319 previous analysis, PLS-DA identified that humoral recognition of both S1 and S2 subregions  
320 was driving the phenotype, and not simply RBD-responsive antibodies, which bear the majority  
321 of neutralizing activity.

322 To more closely delineate protective signatures stimulated by the VRP spike vaccines, we  
323 performed cross-correlative analyses for the entire data set as well as each VRP spike vaccine  
324 (**Fig. S6**). To summarize the correlation matrices and identify trends, we highlighted  
325 associations with strong, significant correlations ( $0.7 - 1$ ,  $p < 0.05$ ) from each VRP spike  
326 vaccine, focusing on IgG2a, functional assays, and Fc-gamma receptors FcγR3/R4 stimulated  
327 by the SARS-CoV-2 spike antigens (**Fig. 6A**). Strikingly, while numerous S1 and S2 correlates

328 were identified, there was little overlap between the two. Recognition of S2 by various VRP  
329 spike sera was tied to Fc-effector mediated functions, while S1 demonstrated strong  
330 correlations with FcγR4, but was not statistically tied to effector functions (**Fig. 6A, B**). Using a  
331 peptide scanning array that spanned the majority of S2, we identified that heptad repeat region  
332 2 (HR2), the fusion peptides (FP), and the stalk subregions drove much of the IgG2a  
333 recognition. Notably, we found that full spike, S2, and S2 subdomain-specific IgG2a and the  
334 phagocytic functional assays (ADNP/ADCP) had a strong correlation for the more distant  
335 heterologous VRP spike vaccines (HKU3, SARS-CoV, WIV1, SHC014). We also found that the  
336 VRP SARS-CoV-2 and the more protective spike vaccines (HKU3, RaTG13) IgG2a correlated  
337 with ADCD (**Fig. 6A**). Generally, FcR stimulation was clade-dependent and in some cases  
338 similar to the clade-dependent *in vivo* protection characterized above. FcγR4 was most  
339 activated by clade 1b and 2 VRP spike sera (SARS-CoV-2, RaTG13, and HKU3), and less so  
340 by clade 1a VRP spike sera (SARS, SHC014, and WIV1) (**Fig. 6B**). Consequently, we  
341 evaluated the capacity for the VRP spike serum to stimulate antibody-dependent cellular  
342 phagocytosis (ADCP) and neutrophil phagocytosis (ADNP) against the SARS-CoV-2 full spike  
343 as previously described at the univariate level (37, 55). Overall, we found notable and significant  
344 increases in ADNP (**Fig. 6C**) as well as significant ADCP against the SARS-CoV-2 full spike  
345 (**Fig. 6D**) in VRP spike vaccine sera. However, the magnitude of response was not clearly  
346 clade-dependent.

347 Though we identified variable responses, our data as compiled by systems serology analysis  
348 demonstrate that VRP spike-specific, non-neutralizing antibodies stimulate FcR effector  
349 functions. These functions are mechanistically linked to FcγR4 binding IgG2a, and additional  
350 heatmap analysis of the heterologous VRP spike sera (**Fig. S7**) indicated that, not only did  
351 IgG2a cluster very well with itself, but the heptad repeat regions (HR1, HR2), and stalk  
352 subdomains of spike also exhibited the greatest strength of binding (**Fig. S7A**). When evaluating  
353 subclass binding within S2, a peptide scanning array also indicated that IgG2a bound with high  
354 significance to the HR1, HR2, fusion peptide (FP), and stalk subdomains of S2 (**Fig. S7B**).

355 Since HKU3 and RaTG13 spike vaccines showed the highest level of protection against  
356 heterologous SARS-CoV-2 challenge, we asked whether there was a correlation between  
357 domain specific antibody binding and disease severity. The magnitude of VRP HKU3 spike  
358 serum IgG2a binding the HR1 shared a very significant correlation (Pearson's  $r = 0.92$ ,  $p < 0.05$ ,  
359  $n = 4$ ) with protection from disease as measured by AUC of body weight maintenance curves.  
360 Likewise, VRP RaTG13 sera S2 binding also showed a very significant correlation (Pearson's  $r$

361 = 0.91,  $p < 0.05$ ,  $n = 4$ ) with protection from disease. Surprisingly, we found significant  
362 correlations between protection from disease and antibody binding in most S2 subdomains for  
363 WIV1 but in contrast to most other vaccine groups, failed to detect correlations between  
364 protection and functional assays like ADCD and ADCP for WIV1. Under further evaluation, we  
365 found that *in vivo* protection elicited by other VRP spike vaccines were linked to S2, but not  
366 single domains. Notably the SHC014 VRP spike vaccine was also closely linked to the NTD  
367 **(Fig. S7C)**. These data suggest that the sum of smaller fractions of cross-reactive antibody  
368 responses may also contribute to protection in the context of the more distant, less protective  
369 vaccine strains in addition to the capacity of the binding antibodies to stimulate protective FcR  
370 effector responses.

371 These data implicate sequence conservation in linear epitopes of S2, especially HR1, in  
372 addition to cellular functional stimulation as a driver of the cross-protective, non-neutralizing  
373 antibody response elicited by VRP-vectored sarbecovirus spikes. Within S2, the HR2  
374 subdomain is 100% conserved between the sarbecovirus spikes tested, while the HR1  
375 subdomain contains sequence variation. The HR1 subdomain of RaTG13 and HKU3 is 100%  
376 and 98.7% identical to the SARS-CoV-2 HR1 subdomain, respectively. In contrast, the HR1  
377 subdomains of the clade 1a sarbecovirus spikes which showed less protection, share 88.3-  
378 89.6% identity to the SARS-CoV-2 spike HR1 **(Fig. S7D)**. These results support the hypothesis  
379 that the binding of non-neutralizing antibodies to conserved sequences within the HR1 domain  
380 may contribute to heterologous protection against SARS-CoV-2 challenge in our model.

### 381 **VRP spike vaccinations induce antibody-mediated protection via Fc effector mechanism**

382 Given indications of non-neutralizing, antibody-dependent cellular function by serological  
383 assays, we conducted a prophylactic passive transfer experiment to further evaluate the role of  
384 antiserum in cross protection from clinical disease. Serum from VRP spike (SARS-CoV-2,  
385 SARS-CoV, HKU3, and GFP) vaccinated mice was pooled for a given group and then  
386 administered intraperitoneally into naïve mice (Taconic and Envigo, Envigo  $n = 5$  reported).  
387 Twenty-four hours later, the mice were challenged with  $10^4$  PFU of SARS-CoV-2 MA10 in a  
388 lethal challenge. Importantly, compared to GFP control, SARS-CoV-2 and HKU3 VRP serum  
389 recipients experienced significant reductions in weight loss (statistically significant by day 5 post  
390 infection), while the SARS-CoV VRP serum recipients developed more severe weight loss that  
391 was not significantly reduced compared to control serum recipients **(Fig. 6E)**. We also observed  
392 significant reductions in GLD scoring by all groups, demonstrating that passive transfer of  
393 antibodies mitigated severe/lethal disease **(Fig. 6F)**. This was in contrast with detected viral

394 loads which were exclusively mitigated by VRP SARS-CoV-2 antigen (**Fig. 6G**). This provides  
395 further support to the hypothesis that neutralizing antibodies play a substantial role in limiting  
396 viral replication and disease, whereas non-neutralizing antibodies primarily mitigate disease  
397 pathology. Collectively, these data suggest that there is a clear role for antibodies, albeit non-  
398 neutralizing, in vaccine cross protection against SARS-CoV-2.

399 To further probe the mechanism of VRP spike cross-protection, we vaccinated FcR-deficient  
400 BALB/c mice (Taconic, n = 6) before lethal challenge with SARS-CoV-2 MA10. We found that,  
401 when Fc effector function is effectively eliminated, protection against SARS-CoV-2 disease in  
402 mice afforded by vaccination with VRP HKU3 spike was eliminated (**Fig. 6H-J**). Both  
403 rapid/sustained weight loss (**Fig 6H**) and GLD (**Fig. 6I**) were evident in the FcR KO mice  
404 immunized with VRP HKU3, and unlike WT mice, were statistically indistinguishable from GFP-  
405 vaccinated mice. However, FcR-deficient mice vaccinated with VRP SARS-CoV-2 spike were  
406 still protected from clinical disease and virus replication, again consistent with a strong  
407 homologous neutralizing antibody response (**Fig. 6J**). This indicates that cross protection is  
408 mechanistically linked to FcR-mediated responses despite a potent homologous protective  
409 profile.

410 To further evaluate the role for FcR effector function (e.g. macrophages, neutrophils) in VRP  
411 spike cross-protection *in vivo*, we conducted a prophylactic passive transfer experiment in FcR-  
412 deficient BALB/c mice (Taconic, n = 5), prior to lethal challenge with SARS-CoV-2 MA10. As  
413 evidenced by weight loss (**Fig. 6K**) and GLD scores (**Fig. 6L**), we found that the SARS-CoV-2  
414 spike homologous sera still protected against severe disease in the absence of FcR effector  
415 function. Additionally, we found significant reductions in virus titer in the lungs of animals that  
416 received VRP SARS-CoV-2 spike sera, again supporting a strong homologous neutralizing  
417 antibody response (**Fig. 6M**). However, we found that the heterologous SARS-CoV and HKU3  
418 VRP sera failed to protect in FcR-deficient mice (**Fig. 6L-N**). When compared to wild-type mice  
419 as previously described, FcR-deficient mice had increased GLD and increased weight loss, with  
420 no decrease in virus titer in the lungs. FcR-deficient mice that received heterologous VRP sera  
421 surpassed 20% weight loss on day 5 post infection, indicative of lethal disease. This indicates  
422 that strain-specific antibodies capable of neutralization can protect from disease, but cross  
423 protection is mechanistically linked to non-neutralizing, FcR-mediated responses.

424 Altogether, our data indicate that neutralizing antibodies can protect from disease, but are  
425 oftentimes limited to homologous challenges after VRP vaccination. Rather, non-neutralizing

426 FcR function is a primary driver of VRP spike antibody-mediated cross protection from  
427 sarbecovirus disease.

## 428 **DISCUSSION**

429 The emergence of SARS-CoV-2 underscores the tragic global consequences of a recently  
430 emerged zoonotic virus. The COVID-19 pandemic has resulted in massive human suffering and  
431 global economic upheavals with millions of deaths. When considering the continued spread of  
432 SARS-CoV-2 VOC, coupled with large numbers of zoonotic reservoir strains poised for cross  
433 species movement, robust countermeasures that elicit broad, cross-protective immune  
434 responses offer considerable hope for controlling sarbecovirus epidemics. Though a potent  
435 neutralizing antibody response is a benchmark for COVID-19 vaccine efficacy, recent work has  
436 identified that SARS-CoV-2 S2P mRNA vaccines elicited limited cross neutralizing antibody  
437 titers against heterologous sarbecoviruses and the SARS-CoV-2 Omicron VOC (18, 56, 57).  
438 Moreover, several studies have suggested a potential role for non-neutralizing antibody function  
439 in protection against SARS-CoV-2 disease (35, 36, 58), highlighting a critical need for  
440 identification of additional correlates associated with pan-sarbecovirus protection. As alphavirus  
441 replicons are under development as COVID-19 vaccines that induce mucosal, humoral and  
442 cellular immune responses, they provide innovative models for understanding cross immune  
443 mechanisms (15–17). In the present study, we found that non-neutralizing antibodies can  
444 contribute to broad cross-vaccine protective immunity across clade 1a, 1b, and clade 2  
445 sarbecoviruses, with as little as 75% amino acid identity between spike protein amino acid  
446 sequences. Our studies further support an important protective role for non-neutralizing  
447 antibodies, especially in cases of heterologous virus infection across distant sarbecoviruses, via  
448 antibody interactions with FcR effector functions as a driver of protective immunity (36). In  
449 addition to T cell immunity (59), a good universal vaccine will likely stimulate multiple arms of  
450 the B cell-driven immune response – including potent type-specific, as well as broadly cross-  
451 neutralizing and non-neutralizing antibodies that promote FcR effector functions.

452 Consonant with a potent neutralizing antibody response described previously (44), VRP SARS-  
453 CoV-2 spike vaccination prevented severe disease in young mice and significantly reduced  
454 virus replication in the airway after SARS-CoV-2 MA10 challenge. Highly potent mRNA vaccines  
455 target neutralizing antibody responses to the S1 RBD domain (60, 61) and potent neutralizing  
456 antibodies targeting one or more epitopes in the RBD (28), NTD (62), or S2 (63, 64) have been  
457 identified in the spike protein. Consonant with established work, we found the homologous  
458 neutralizing antibody response stimulated by the VRP platform preferentially targeted the

459 receptor-binding domain (targeted by VRP SARS-CoV-2 S) and/or the N-terminal domain (both  
460 targeted by VRP SHC014 S). S1 is highly divergent across sarbecoviruses, but contains  
461 conserved regions that stimulate cross-neutralizing antibodies (28, 34). However, we failed to  
462 detect protective levels of cross-neutralizing antibodies elicited by heterologous VRP spike  
463 vaccines after prime and boost, similar to other SARS-CoV-2 vaccines (18, 60). While this  
464 finding may be related to VRP vaccine dose, our data also suggest that different sarbecoviruses  
465 may focus neutralizing antibody responses to different sites within S1, potentially complicating  
466 universal vaccine platforms focused exclusively on the RBD, especially when applied to outbred  
467 populations, like the human population (65, 66).

468 Although heterologous spike vaccines failed to elicit cross neutralizing antibodies against  
469 SARS-CoV-2 and still allowed infection in the lungs, these vaccines reduced viral loads in the  
470 lungs and provided partial protection from SARS-CoV-2 disease in *in vivo*. A similar phenotype,  
471 mediated by coronavirus nucleocapsid-based vaccines that stimulate T cells, has been reported  
472 following SARS-CoV and MERS-CoV challenge (59). While our data does not explicitly rule out  
473 a contribution of T cells in mediating protection after VRP vaccination, passive antibody transfer,  
474 systems serology, and vaccine studies in wild-type versus FcR deficient mice mechanistically  
475 link these non-neutralizing antibody functions as strong drivers of cross protection

476 In our model, cross-protection was highly clade dependent, as clade 1b and clade 2 VRP spikes  
477 protected with higher efficacy against SARS-CoV-2 disease than clade 1a VRP spikes. Clade 2  
478 HKU3 contains as much antigenic diversity with the SARS-CoV-2 spike as clade 1a WIV1.  
479 However, the VRP HKU3 spike elicited near-complete protection from SARS-CoV-2 MA10  
480 disease while the VRP WIV1 spike did not. This clade-dependent protection suggests that  
481 specific domain conservation, rather than overall sequence homology, drives the development  
482 of protective antibodies in our model. Additionally, we found that VRP SARS-CoV-2 spike  
483 vaccination, while unable to prevent infection, provided partial protection against disease  
484 induction by the heterologous bat virus, HKU3-SRBD MA. This result aligns with current data  
485 regarding spike-based vaccine efficacy against SARS-CoV-2 variants in the human population;  
486 where currently approved vaccines may not prevent variant infection in all cases but significantly  
487 reduce disease severity and death (67–70). Our model noted no cross protection following  
488 contemporary human coronavirus spike vaccinations against SARS-CoV-2. While contrary to  
489 some earlier correlative studies (22, 71–74), these differences may reflect repeat group 1A/2B  
490 human  $\beta$ -coronavirus infections, which might result in more cross protective humoral responses,  
491 highlighting an area of future investigation. Overall, our results indicate that when faced with

492 future sarbecovirus emergence events, cross protection from vaccine-mediated SARS-CoV-2  
493 immunity has the potential to reduce disease severity or breadth of transmission. Still, this  
494 protection is less likely to extend beyond the sarbecovirus subgenus.

495 There is increasing evidence of a potential role for non-neutralizing antibodies in long-term  
496 SARS-CoV-2 vaccine protection, especially against VOC (39, 58, 75). Consistent with these  
497 data, while heterologous antibodies elicited by VRP 3526-delivered sarbecovirus spikes did not  
498 neutralize SARS-CoV-2, we detected and characterized cross-protective non-neutralizing  
499 antibody activity through passive transfer experiments and systems serology. Our data  
500 highlights non-neutralizing antibodies as correlates of heterologous vaccine-mediated protection  
501 in an FcR-dependent manner. Furthermore, we detected strong FcR stimulation by antibodies  
502 that recognized the SARS-CoV-2 spike as well as the S1 and S2 regions, especially the heptad  
503 repeat 1 (HR1) region of S2, from the heterologous vaccines. Sarbecovirus strain variation-  
504 dependent diversity of response in addition to the many instances of correlated stimulus  
505 supports the hypothesis that the non-neutralizing cross protection may also be a function of the  
506 cumulative effect of epitope conservation rather than driven by single or few broadly cross-  
507 protective epitopes that are conserved across  $\beta$ -coronaviruses (76). Thus, Fc-effector immunity  
508 may depend upon the number and quality of cross binding epitopes as well as the abundance of  
509 cross-reactive antibodies, coupled with the types of FcR/effector mediated phenotypes.

510 Further supporting our results, we found that both homologous and heterologous protection was  
511 less robust in aged animals, consistent with existing work (44, 51). Notably, age related waning  
512 of FcR effector functions is thought to impact both vaccine efficacy and infection response (77–  
513 79). Notably, neutrophil responses wane in aged populations and become dysregulated after  
514 pulmonary infection (79). Additionally, overall effector cell function (e.g. infected cell killing)  
515 becomes impaired with increased age (77, 78). Thus, as a function of increasing virus challenge  
516 dose in aged animals, increased VRP sarbecovirus spike vaccine failure is consistent with  
517 reduced FcR mediated protection, a prospect that will need to be carefully investigated in future  
518 vaccine studies focused on the elderly.

519 While this work has shown that the VRP platform is a valuable experimental platform for  
520 studying cross-protective coronavirus immunity, especially regarding non-neutralizing antibody  
521 responses, the study design also highlights many areas for further investigation. The same  
522 susceptibility loci appear to regulate sarbecovirus pathogenesis in mice and humans (53), and  
523 the mouse model reproduces key aspects of acute and chronic SARS-CoV-2 induced disease  
524 (42, 43). Furthermore, mouse models of SARS-CoV-2 disease have proven to be robust



525 platforms for predicting SARS-CoV-2 vaccine performance in humans (53, 80–82) and the  
526 alphavirus replicon strategy has shown utility as a vaccine platform (83–86). However, systems  
527 serology responses following alphavirus vaccination in humans have not been reported,  
528 including any reporting on non-neutralizing antibody functional activity. This study is the first that  
529 clearly implicated FcR-mediated protection following alphavirus VRP vaccination in any species  
530 as well as the first to directly correlate the FcR mechanism of cross-protection to disease  
531 outcome. However, our data was drawn from a limited sample size for correlation to disease ( $n$   
532 = 4), prompting a need for further mechanistic investigation. Still, detailed systems serology  
533 studies have also suggested a robust correlative role for FcR-mediated protection after mRNA  
534 vaccination and the durability of protection when compared to prior infection (39). Additionally,  
535 FcR mechanisms of protection have been implicated in HIV vaccination (45), influenza  
536 vaccination (87–89), and DENV prior infection (90).

537 Although speculative, the results identified here may likely be relevant to understanding the  
538 mechanisms that promote vaccine-induced SARS-CoV-2 immunity in humans, as also  
539 evidenced by the fact that a recombinant SARS-CoV-2 RBD protein vaccine conferred cross  
540 protection in the absence of a potent cross neutralizing antibody response (91). However, most  
541 vaccine designs have not been tailored to maximize protective FcR effector functions despite  
542 clear animal model studies that have demonstrated that specific activation of distinct Fc $\gamma$ R-  
543 mediated pathways significantly improves antibody-mediated protection as well as sustained  
544 and robust immune responses (39, 92–94). In addition, the exact antibodies and epitopes that  
545 contribute to cross protection via FcR mediated activities remain unclear, but obviously would  
546 help guide future pan-coronavirus therapeutic development including both monoclonal antibody  
547 treatment and vaccines. This is especially interesting in the unique case of cross-protection we  
548 observed with VRP HKU3 S. Investigating epitope conservation, in this case, may identify novel  
549 spike epitopes that contribute to broad cross-protection. For example, our work would propose  
550 that a pan-sarbecovirus vaccine would benefit from inclusion of the HR1 spike subdomain to  
551 induce cross-protective FcR effector responses. These studies also suggest that the VRP  
552 platform represents a valuable system both for human vaccine delivery and for dissecting the  
553 aspects of vaccine-induced immunity that mediate protection. It will be essential to determine  
554 whether these results extend beyond standard inbred mouse strains by testing their impact in  
555 outbred populations, such as the Collaborative Cross (95, 96), or other models of SARS-CoV-2-  
556 induced disease like non-human primates to further probe the mechanisms of cross protection  
557 discussed.

558 As SARS-CoV-2 is the second sarbecovirus to emerge in the 21<sup>st</sup> century, other coronaviruses  
 559 will likely arise in the future, including those with similar or different spike sequences to those  
 560 examined in this study (e.g. SHC014 and WIV1) (4) and others (e.g. swine acute diarrhea  
 561 syndrome (SADS) coronavirus) (97). Therefore, the inclusion of non-neutralizing, cross-  
 562 protective epitopes informed by the results of our study may shift vaccine development toward a  
 563 more comprehensive, cross-protective formulation that prevents life-threatening sarbecovirus  
 564 disease and provide new insights for vaccine design against other highly heterogeneous RNA  
 565 virus families, including *Coronaviridae*.

566 **FIGURES**

567 **Table 1. Amino acid percent similarity | patristic phylogenetic distance of sarbecovirus**  
 568 **spike proteins**

|                 | <b>SARS-CoV-2</b> | <b>RaTG13</b> | <b>SARS-CoV</b> | <b>SHC014</b> | <b>WIV1</b>  |
|-----------------|-------------------|---------------|-----------------|---------------|--------------|
| <b>RaTG13</b>   | 97.4   0.023      |               |                 |               |              |
| <b>SARS-CoV</b> | 75.6   0.248      | 76.2   0.247  |                 |               |              |
| <b>SHC014</b>   | 76.8   0.246      | 77.0   0.245  | 90.0   0.099    |               |              |
| <b>WIV1</b>     | 76.5   0.233      | 77.0   0.232  | 92.3   0.086    | 97.1   0.030  |              |
| <b>HKU3</b>     | 75.8   0.248      | 76.0   0.247  | 78.1   0.225    | 78.8   0.223  | 78.8   0.210 |

569 **AA % similarity | patristic phylogenetic distance**

570

571 **Figure 1. Venezuelan Equine Encephalitis Virus Replicon Particle VRP3526 for high-titer**  
 572 **vaccinations. A.** Fragmented RNA-based assembly scheme of VRP3526 particles. **B.**  
 573 Phylogenetic relationships of CoV spike proteins that were used in this study, including common  
 574 cold CoVs (green) and prepandemic/epidemic CoVs (red). Of the  $\beta$ -coronaviruses, we  
 575 generated spike proteins for both group 2A (HKU1) and 2B viruses. Of the group 2B viruses, we  
 576 generated spike proteins for clade 1a (SARS-CoV, SHC014, WIV1), 2 (HKU3), and 1b (SARS-  
 577 CoV-2, RaTG13) viruses. Tree generated from an amino acid multiple sequence alignment  
 578 using Maximum Likelihood in Geneious Prime. **C.** VRP3526 titers obtained in this study. Dashed  
 579 line denotes minimum titer required for vaccination at  $2 \times 10^4$  VRP in a 10  $\mu$ l footpad inoculation.  
 580 **D.** Immunofluorescent staining at 40x magnification for VEE non-structural proteins (top) and

581 SARS-CoV-2 spike S2 domain (middle) in Vero E6 cells infected with VRPs expressing the  
582 spike proteins used in this study.

583 **Figure 2. VRP sarbecovirus spike vaccines elicit a cross-protective immune response**

584 **against SARS-CoV-2. A** SARS-CoV-2 lung titer calculated via plaque assay on days 2 and 5  
585 post infection. Samples that fell below the limit of detection (dotted line) were set to 25 PFU/mL.

586 **B.** Area under the curve (AUC) of lung function metrics of airflow resistance (PenH, right) and  
587 bronchoconstriction (Rpef, left). Lung function was measured by BUXCO whole body

588 plethysmography systems one each experimental day, AUC calculated for time course of each  
589 mouse. **C-E.** Body weights calculated after infection of  $10^4$  PFU SARS-CoV-2 intranasally

590 through the duration of the experiment on animals vaccinated with clade 1b (**C**), 2 (**D**), and 1a  
591 (**E**) sarbecovirus spike proteins. Reported as percent of starting weight. Horizontal line indicates

592 20% body weight lost and animal care humane endpoint. **F.** Semi-quantitative gross lung  
593 discoloration (GLD) scoring, **G.** Diffuse alveolar damage (DAD) scoring, and **H.** acute lung injury

594 (ALI) scoring upon tissue harvest at day 5 post infection. **I.** Hematoxylin and eosin stained  
595 sections of lungs from vaccinated mice harvested day 5 post infection. Black arrow – hyaline

596 membrane, blue arrow – neutrophil infiltrate, red arrow – proteinaceous debris. Top – 100x  
597 magnification, 100  $\mu$ m scale. Bottom – 400x magnification, 50  $\mu$ m scale. \*  $p < 0.05$ , \*\*  $p < 0.01$ ,

598 \*\*\*  $p < 0.001$ , \*\*\*\*  $p < 0.0001$  after statistical testing described in methods.

599 **Figure 3. VRP Spike protects from lethal infection in vulnerable aged mice.** Old mice (12

600 months) were challenged with  $10^3$  PFU SARS-CoV-2 MA10 intranasally unless otherwise noted.

601 **A-C.** Body weights calculated through the duration of the experiment on animals vaccinated with  
602 clade 1b (**A**), 2 (**B**), and 1a (**C**) sarbecovirus spike proteins. Reported as percent of starting

603 weight. Horizontal line indicates 20% body weight lost and animal care humane endpoint. **D.**

604 GLD scoring upon tissue harvest. **E.** SARS-CoV-2 lung titer calculated via plaque assay.

605 Samples that fell below the limit of detection (dotted line) were set to 25 PFU/mL. **F.** Area under  
606 the curve (AUC) of lung function metrics of airflow resistance (PenH, right) and

607 bronchoconstriction (Rpef, left). Lung function was measured by BUXCO whole body

608 plethysmography systems one each experimental day, AUC calculated for time course of each  
609 mouse. **G.** Survival of vaccinated animals when challenged with  $10^4$  PFU SARS-CoV-2 MA10

610 intranasally. \*  $p < 0.05$ , \*\*  $p < 0.01$ , \*\*\*  $p < 0.001$ , \*\*\*\*  $p < 0.0001$  after statistical testing

611 described in methods.

612 **Figure 4. VRP SARS-CoV-2 spike vaccination protects against heterologous challenge.**

613 Young mice (16-18 weeks) were challenged with  $10^5$  PFU HKU3/sRBD MA (**A-C**) or old mice

614 (12 months) were challenged with  $10^5$  PFU SARS-CoV-2 MA10 containing the omicron variant  
615 spike (**D-F**) intranasally. **A.** Body weights calculated through the duration of the experiment on  
616 animals vaccinated with SARS-CoV-2 or HKU3 spike proteins, or vectored GFP. **B.** Semi-  
617 quantitative macroscopic lung discoloration scoring upon tissue harvest. **C.** HKU3 lung titer  
618 calculated via plaque assay. \*  $p < 0.05$ , \*\*  $p < 0.01$ , \*\*\*  $p < 0.001$ , \*\*\*\*  $p < 0.0001$  after statistical  
619 testing described in methods. Body weights reported as percent of starting weight where  
620 horizontal line indicates 20% body weight lost and animal care humane endpoint. Titer samples  
621 that fell below the limit of detection (dotted line) were set to 25 PFU/mL.

622 **Figure 5. Characterizing the antibody response through systems serology and functional**  
623 **assays. A.** SARS-CoV-2 spike (left), receptor binding domain (middle), and N-terminal domain  
624 (right) binding IgG quantified by ELISA. Titers calculated via area under the curve (AUC). **B.**  
625 SARS-CoV-2 spike binding IgG2a titers plotted against IgG1 titers. Titer calculated by gMFI. **C.**  
626 SARS-CoV-2 spike (left), S1 (middle), and S2 (right) binding IgG2a titer calculated by gMFI via  
627 Luminex bead assay. \*  $p < 0.05$ , \*\*  $p < 0.01$ , \*\*\*  $p < 0.001$ , \*\*\*\*  $p < 0.0001$  after statistical testing  
628 described in methods, comparing each vaccine group to GFP. **D.** SARS-CoV-2 neutralization  
629  $IC_{50}$  values calculated as the serum dilution that achieved 50% neutralization in a live-virus  
630 neutralization assay. **E.** Domain-specific  $IC_{50}$  values measured by live-virus neutralization assay  
631 against different SARS-CoV-2 spike domains on a heterologous virus backbone (SHC014). **F.**  
632 SHC014 neutralization  $IC_{50}$  values of serum from vaccinated animals. **G.** Domain-specific  $IC_{50}$   
633 values measured by live-virus neutralization assay against different SARS-CoV-2 spike domains  
634 on the SHC014 backbone.  $IC_{50}$  for samples that fell below the limit of detection (dotted line)  
635 were set to 10. **H.** A scores plot representing the baseline (blue) and post-boost (red) vaccine  
636 immunoglobulin and functional profile distribution for all vaccinated animals tested, clustered via  
637 PLSDA (partial least squares discriminant analysis). **I.** VIP score of most influential features,  
638 representing the total distance from the center of the scores plot, as determined by PLSDA of  
639 immunoglobulin and functional profiles. **J.** A scores plot representing the baseline (blue) and  
640 post-boost (red) vaccine Fc receptor stimulation and functional profile distribution for all  
641 vaccinated animals tested, clustered via PLSDA (partial least squares discriminant analysis). **K.**  
642 VIP score of most influential features, representing the total distance from the center of the  
643 scores plot, as determined by PLSDA of Fc receptor stimulation and functional profiles.

644 **Figure 6. Non-neutralizing antibodies mediate protection *in vivo* through Fc function. A.**  
645 Pearson's correlation matrices were constructed of the systems serology assays for each VRP  
646 vaccination group (**Supplemental data**). VRP vaccine groups with strong correlations (0.7 – 1)

647 between two assay results are listed in the table. **B.** FcγR4 stimulation against the SARS-2  
648 spike (left), S1 (middle), and S2 (right) **C.** Phagocytic score of antibody-dependent neutrophil  
649 phagocytosis (ADNP) and **D.** Phagocytic score of antibody-dependent cellular phagocytosis  
650 (ADCP). **E.** body weights, **F.** GLD scores day 5 post infection, and **G.** SARS-2 lung titer in naïve  
651 mice after passive transfer of serum from vaccinated animals followed by intranasal infection of  
652  $10^4$  PFU SARS-2. **H.** Body weights, **I.** GLD scores day 5 post infection, and **J.** SARS-2 lung titer  
653 of young Fc receptor knockout BALB/c mice that were vaccinated with a sarbecovirus spike  
654 protein prior to infection with  $10^4$  PFU SARS-2 intranasally. **K.** Body weights, **L.** GLD scores day  
655 5 post infection, and **M.** SARS-CoV-2 lung titer of young Fc receptor knockout BALB/c mice that  
656 received prophylactic administration of serum from vaccinated wild-type BALB/c mice prior to  
657 infection with  $10^3$  PFU SARS-CoV-2 intranasally. \*  $p < 0.05$ , \*\*  $p < 0.01$ , \*\*\*  $p < 0.001$ , \*\*\*\*  $p <$   
658  $0.0001$  after statistical testing described in methods. Body weights reported as percent of  
659 starting weight where horizontal line indicates 20% body weight lost and animal care humane  
660 endpoint. Titer samples that fell below the limit of detection (dotted line) were set to 25 PFU/mL.

661 **Figure S1. Pairwise sequence alignments of sarbecovirus spike proteins to the SARS-**  
662 **CoV-2 spike protein.** Global alignments constructed with Blosum62 matrix with free end gaps  
663 in Geneious Prime. Alignments of SARS-CoV-2 to **A.** RaTG13 **B.** HKU3 **C.** SARS **D.** WIV1 and  
664 **E.** SHC014. Blue – NTD, red – RBD, green – S2.

665 **Figure S2. VRP-vectored endemic coronavirus spike protein vaccinations do not protect**  
666 **against severe SARS-CoV-2 disease in young BALB/c mice.** **A.** Body weights and **B.** lung  
667 titer calculated for animals vaccinated with spike proteins from contemporary human CoVs. **C.**  
668 Percent survival of animals vaccinated with each spike protein. \*  $p < 0.05$ , \*\*  $p < 0.01$ , \*\*\*  $p <$   
669  $0.001$ , \*\*\*\*  $p < 0.0001$ .

670 **Figure S3. Lung cytokine signatures in VRP-vaccinated mice.** Measured by BioPlex,  
671 cytokine signatures associated with immune responses were measured on days 2 and 5 post-  
672 infection with SARS-CoV-2 MA10. \*  $p < 0.05$ , \*\*  $p < 0.01$ , \*\*\*  $p < 0.001$ , \*\*\*\*  $p < 0.0001$ .

673 **Figure S4. VRP-vectored cross-protection wanes in aged animals with high dose lethal**  
674 **challenge.** Old mice (12 months) were challenged with  $10^4$  PFU SARS-CoV-2 MA10  
675 intranasally. **A.** Body weights calculated through the duration of the experiment on animals  
676 vaccinated with sarbecovirus spike proteins. Reported as percent of starting weight. **B.** Semi-  
677 quantitative macroscopic lung discoloration scoring upon tissue harvest. **C.** SARS-CoV-2 lung  
678 titer calculated via plaque assay. \*  $p < 0.05$ , \*\*  $p < 0.01$ , \*\*\*  $p < 0.001$ , \*\*\*\*  $p < 0.0001$ . Body  
679 weights reported as percent of starting weight where horizontal line indicates 20% body weight

680 lost and animal care humane endpoint. Titer samples that fell below the limit of detection (dotted  
681 line) were set to 25 PFU/mL.

682 **Figure S5. Systems serology reveals novel mechanisms of protection.** The geometric  
683 mean fluorescent intensity (gMFI) value of each systems serology assay for a given serum  
684 sample plotted on a heatmap after log transformation.

685 **Figure S6. Correlation matrix of all systems serology metrics tested.** Pearson's correlation  
686 coefficient calculated for each pair of systems serology assay for the listed set of post-boost  
687 serum samples. **A.** Full data set of metrics for all samples. **B.** VRP GFP **C.** VRP SARS-CoV-2  
688 spike **D.** VRP RaTG13 spike **E.** VRP HKU3 spike **F.** VRP SARS-CoV spike **G.** VRP WIV1 spike  
689 **H.** VRP SHC014 spike post boost serum samples tested.

690 **Figure S7. Identification of likely cross-protection drivers.** **A.** Heatmap identifying IgG2a  
691 peptide recognition clusters. **B.** Background-subtracted IgG2a peptide binding within S2 **C.** VRP  
692 vaccine groups with strong correlations between disease (AUC bodyweight curve) and antibody  
693 factors as identified via Pearson's correlation matrices. **D.** Multiple sequence alignments of S2  
694 subdomains.

## 695 **METHODS**

### 696 **Biosafety and institutional approval**

697 All experiments were conducted after approval from the UNC Chapel Hill Institutional Biosafety  
698 Committee and Institutional Animal Care and Use Committee according to guidelines outlined  
699 by the Association for the Assessment and Accreditation of Laboratory Animal Care and the US  
700 Department of Agriculture. All vaccinations were performed at ABSL2 while all infections and  
701 downstream assays were performed at ABSL3 in accordance with Environmental Health and  
702 Safety. All work was performed with approved standard operating procedures and safety  
703 conditions for SARS-CoV-2. Our institutional ABSL3 facilities have been designed to conform to  
704 the safety requirements recommended by Biosafety in Microbiological and Biomedical  
705 Laboratories (BMBL), the US Department of Health and Human Services, the Public Health  
706 Service, the Centers for Disease Control and Prevention (CDC), and the National Institutes of  
707 Health (NIH). Laboratory safety plans have been submitted, and the facility has been approved  
708 for use by the UNC Department of Environmental Health and Safety (EHS) and the CDC.

### 709 **Cell Lines and viruses**

710 All cell lines and viruses were confirmed mycoplasma-negative. All viruses used were subjected  
711 to next-generation sequencing prior to use. Vero E6 cells were maintained in Dulbecco's  
712 Modified Eagle's Medium (DMEM) supplemented with 5% FBS and anti/anti. Baby Hamster  
713 Kidney (BHK21) cells were maintained in  $\alpha$ -MEM supplemented with 10% fetal bovine serum,  
714 L-glutamine, and 10% tryptose phosphate broth. Mouse adapted SARS-CoV-2 MA10(42) and  
715 SARS-CoV-2 nanoLuciferase reporter viruses were developed based on the SARS-CoV-2 WA1  
716 reference strain (98) and propagated from a cDNA molecular clone as previously described.  
717 Mouse adapted bat virus HKU3 was generated from a cDNA molecular clone (11, 53) and  
718 mutations were inserted that cause pathogenesis in mice. To generate the SARS-CoV-2 spike  
719 domain panel, the backbone sequence from bat virus SHC014 (4) was used. SHC014 spike  
720 sequences were replaced with corresponding fragments of the sequence encoding SARS-CoV-  
721 2 spike segments (RBD, RBD+, NTD, RBD-NTD, S1) and viruses were generated from the  
722 cDNA clone.

### 723 **VEE VRP3526 vaccine preparation**

724 The sequence encoding CoV spike proteins (below) were cloned into the pVR21 vector  
725 containing Venezuelan equine encephalitis virus strain 3526 non-structural proteins. RNA from  
726 template pVR21 constructs and VEE 3526 helper constructs encoding glycoprotein and capsid  
727 proteins was transcribed using Invitrogen T7 mMessage mMachine *in vitro* transcription kit.  
728 Purified RNA was electroporated into BHK21 cells in the ratio of 2:1:1 pVR21 construct : VEE  
729 3526 glycoprotein : capsid. Supernatant was harvested and purified 24 hours post-  
730 electroporation and ultracentrifuge concentrated through sucrose cushion. VRP titers were  
731 determined through immunofluorescent staining to detect VEE-associated proteins. All VRPs  
732 were confirmed to not cause cytopathic effect in cell culture before administration to mice.

733 Spike sequences used to construct VRP vaccines:

|            |            |      |            |
|------------|------------|------|------------|
| SARS-CoV-2 | MT020880.1 | HKU3 | FJ211859.1 |
| RaTG13     | MN996532.2 | NL63 | AY567487.2 |
| SARS-CoV   | AY278741   | OC43 | UDM84911.1 |
| SHC014     | KC881005.1 | 229E | KY621348.1 |
| WIV1       | KC881007.1 | HKU1 | HM034837.1 |

734

### 735 **Mice, vaccination, and infection**

736 BALB/cAnNHsd were obtained from Envigo (strain 047) and delivered at either 8-10 weeks  
737 (young) or 11-12 months (old) for vaccination and housed in groups under standard conditions.  
738 Mice were vaccinated with  $2 \times 10^4$  VRP in a 10  $\mu$ l phosphate-buffered saline footpad inoculation  
739 and boosted with the same dose 3 weeks post-prime. Baseline, pre-boost, and pre-challenge  
740 serum was collected via submandibular bleed. Four weeks post-boost, mice were infected with  
741  $10^3$  or  $10^4$  (where specified) PFU SARS-CoV-2 MA10 or  $10^5$  PFU HKU3 MA-SRBD in 50  $\mu$ l PBS  
742 intranasally under ketamine-xylazine anesthesia. The challenge doses were at least one log  
743 higher than the suspect infectious dose in humans (99). For adoptive and passive transfer  
744 experiments, 200  $\mu$ l serum from vaccinated mice was transferred to naïve mice via  
745 intraperitoneal injection 24 hours prior to challenge. Mice were weighed daily through the course  
746 of infection, and a subset's respiratory function was tracked daily using whole body  
747 plethysmography (48). Mice were euthanized at 2 and 5 days post infection via isoflurane  
748 overdose. FcR-knockout mice were obtained from Taconic (Model 584), on a BALB/cAnNTac  
749 background delivered at 6-10 weeks old due to strain availability. The relevant infectious  
750 challenge dose for this strain was determined to be  $10^3$  PFU SARS-CoV-2 MA10 due to strain-  
751 specificities, and mice were infected and monitored as described above.

## 752 **Mouse tissue collection and analysis**

753 After euthanasia, blood was collected into phase separation tubes by cardiocentesis or severing  
754 the vena cava and allowed to clot before centrifugation to separate serum. Lungs were scored  
755 for gross discoloration, indicating congestion and/or hemorrhage, based on a semi-quantitative  
756 scale of mild to severe discoloration covering 0 to 100% of the lung surface. The left lung was  
757 collected and injected with 10% neutral buffered formalin to expand airways before storage in  
758 fixative for 7 days before histopathological processing. Of the right lung lobes, the inferior lobe  
759 was collected in ~1 mL TRIzol reagent with glass beads and the superior lobe was collected in  
760 ~1 mL phosphate buffered saline with glass beads. Both inferior and superior lobes were  
761 homogenized in a MagnaLyser and debris was pelleted. Virus in the lungs was quantified from  
762 the superior lobe via plaque assay. Briefly, virus was serially diluted and inoculated onto confluent  
763 monolayers of Vero E6 cells, followed by agarose overlay. Plaques were visualized on day 2  
764 post infection via staining with neutral red dye. Lung cytokines were quantified from the superior  
765 lobe using the Bio-Plex Pro Mouse Cytokine 23-Plex Immunoassay. RNA from the inferior lobe  
766 was reserved for additional downstream assays.

## 767 **Neutralization assays**



768 A serial dilution (1:20 initially, followed by a 3-fold dilution) of pre-challenge serum was  
769 incubated in a 1:1 ratio with SARS-CoV-2-nLuc (98) to result in 800 PFU virus per well. Serum-  
770 virus complexes were incubated at 37C with 5% CO<sub>2</sub> for 1 hour. Following incubation, serum-  
771 virus complexes were added to a confluent monolayer of Vero E6 cells and incubated for 48  
772 hours at 37C with 5% CO<sub>2</sub>. After incubation, luciferase activity was measured with the Nano-Glo  
773 Luciferase Assay System (Promega) according to the manufacturer specifications.  
774 Neutralization titers (EC<sub>50</sub>) were defined as the dilution at which a 50% reduction in RLU was  
775 observed relative to the virus (no antibody) control.

## 776 **Systems Serology**

777 SARS-CoV-2 and other sarbecovirus and control antigens were resuspended in water to a final  
778 concentration of 0.5 mg/mL and linked to magnetic Luminex beads (Luminex Corp, TX, USA)  
779 through carbodiimide NHS ester linkages. Specific antigens were coupled to individual bead  
780 regions. Biotinylation of antigens were done using the NHS-Sulfo-LC-LC kit, and excess biotin  
781 was removed using Zebra-Spin desalting and size exclusion columns. Antigen coupled beads  
782 were then incubated with serum at various dilutions (1:100 for IgG2a, IgG2b, IgG3, IgM, 1:200  
783 for IgG1, and 1:750 for Fcγ-receptor binding) in a 384-well plate (Greiner, Germany) overnight  
784 at 4°C. Unbound material was washed and detection of isotypes and subclasses were done  
785 using PE-conjugated anti-IgG1, -IgG2a, -IgG2b, -IgG3, -IgM. PE-Streptavidin (Agilent  
786 Technologies, CA, USA) was coupled to recombinant and biotinylated mouse FcγR2b, FcγR3,  
787 and FcγR4A at a 1:1000 dilution. Secondary detection was done at room temperature for 1  
788 hour, and unbound material was removed by washing. Relative binding per antigen was  
789 determined on an IQue Screener PLUS cytometer (IntelliCyt).

790 Antibody-dependent cellular phagocytosis (ADCP) and neutrophil phagocytosis (ADNP) assays  
791 were done as previously described (100). Mouse serum was incubated with cultured monocytes  
792 or primary neutrophils at a concentration of 1:100 on preformed immune complexes on  
793 fluorescent neutravidin microspheres. Cells were fixed with 4% paraformaldehyde (PFA) and  
794 identified by gating on microsphere-positive cells. Phagocytic score was quantified by the  
795 (percentage of microsphere-positive cells) x (MFI of microsphere-positive cells) divided by  
796 100000. Antibody-dependent complement deposition (ADCD) was done as previously described  
797 (101). Relative complement deposition was quantified through flow cytometry, as measured by  
798 fluorescein-conjugated goat IgG that targets the guinea pig complement C3b.

799 Correlations between Fab, FcR, and functional assays were done using GraphPad Prism using  
800 Spearman's coefficients. Statistical significance, as defined by  $p < 0.05$ , was corrected for

801 multiple comparisons using Benjamini-Hochberg correction. Other analyses such as PLS-DA  
 802 were done on R using the systemsseRology pipeline available on GitHub (GitHub -  
 803 LoosC/systemsseRology: Machine learning tools (for the analysis of systems serology data) are  
 804 also available. Each assay contained pre-immune and post-vaccination sera, as well as PBS  
 805 controls to account for batch effects. All other calculations are described below.

806 Key reagents used in systems serology assays

|                                                  |                        |                                                          |
|--------------------------------------------------|------------------------|----------------------------------------------------------|
| Anti-mouse IgG1-PE                               | Southern Biotech       | 1144-09                                                  |
| Anti-mouse IgG2a-PE                              | Southern Biotech       | 1155-09L                                                 |
| Anti-mouse IgG2b-PE                              | Southern Biotech       | 1186-09L                                                 |
| Anti-mouse IgG3-PE                               | Southern Biotech       | 1191-09L                                                 |
| Anti-mouse IgM-PE                                | Southern Biotech       | 1021-09                                                  |
| Anti-CD66b Pac Blue                              | BioLegend              | 305112                                                   |
| Anti-CD3                                         | BD Biosciences         | 558117                                                   |
| Anti-CD16                                        | BD Biosciences         | 557758                                                   |
| Anti-CCL4                                        | BD Biosciences         | 550078                                                   |
| Anti-C3b                                         | MP Biomed              | 855385                                                   |
| SARS-CoV-2 WT Spike                              | Sino Biological        | 40589-V08H4                                              |
| SARS-CoV-2 D614G Spike                           | Sino Biological        | 40589-V08H8                                              |
| SARS-CoV-2 WT S1 Domain                          | Sino Biological        | 40591-V08H                                               |
| SARS-CoV-2 WT Receptor Binding Domain (RBD)      | Sino Biological        | 40592-V08H                                               |
| SARS-CoV-2 WT S2 Domain                          | Sino Biological        | 40590-V08B                                               |
| SARS-CoV-2 WT N-terminal Domain                  | Sino Biological        | 40591-V49H                                               |
| SARS-CoV-2 Alpha Variant S                       | Sino Biological        | 40589-V08B6                                              |
| SARS-CoV-2 Beta Variant S                        | Sino Biological        | 40589-V08B7                                              |
| SARS-CoV-2 Delta Variant S                       | Sino Biological        | 40589-V08B16                                             |
| SARS-CoV-2 Omicron Variant S                     | Sino Biological        | 40589-V08H26                                             |
| Human Coronavirus OC43 S                         | Sino Biological        | 40607-V08B                                               |
| Human CoV HKU1 S (isolate N5)                    | Sino Biological        | 40606-V08B                                               |
| Human Cytomegalovirus (HCMV) Glycoprotein B (gB) | Sino Biological        | 10202-V08H1                                              |
| Human Coronavirus 229E Spike                     | Sino Biological        | 40605-V08B                                               |
| SARS-CoV-1 Spike                                 | Sino Biological        | 40634-V08B                                               |
| PE-Streptavidin                                  | Agilent Technologies   | PB32-10                                                  |
| Guinea Pig Complement                            | Cedarlane              | CL4051                                                   |
| Protein Transport Inhibitor                      | BD Biosciences         | 554724                                                   |
| Brefeldin-A                                      | Sigma                  | B7651                                                    |
| NHS-Sulfo-LC-LC Kit                              | ThermoFisher           | 21435                                                    |
| Zebra-Spin Desalting and Chromatography Columns  | ThermoFisher           | 89882                                                    |
| Fix & Perm Cell Permeabilization Kit             | ThermoFisher           | GAS002S-100                                              |
| R Studio V 1.4.1103                              | RStudio, PBC           | Open Source                                              |
| GraphPad Prism                                   | GraphPad Software, LLC | Ragon Site License                                       |
| FlowJo V. 10.8                                   | FlowJo, LLC            | <a href="http://www.flowjo.com/so">www.flowjo.com/so</a> |

|                                            |                      |                                     |
|--------------------------------------------|----------------------|-------------------------------------|
|                                            |                      | lutions/flowjo/down loads           |
| iQue Forecyt                               | Sartorius            | 60028                               |
| iQue Screener Plus                         | Intellicyt/Sartorius | 11811                               |
| 384-well HydroSpeed Plate Washer           | Tecan                | 30190112                            |
| MagPlex Microspheres                       | Luminex MFG          | MC12001-01<br>(Cataloged by region) |
| Green Fluorescent Neutravidin Microspheres | ThermoFisher         | F8776                               |
| Red Fluorescent Neutravidin Microspheres   | ThermoFisher         | F8775                               |

807

## 808 **Enzyme-Linked Immunosorbent Assay**

### 809 *Full-length spike protein ELISA titer*

810 All serum samples tested by ELISA assay were heat-inactivated at 56°C for 30 min to reduce  
811 risk from possible residual virus in serum. ELISA binding titer for full-length spike protein was  
812 measured as described before (102). Essentially, full-length spike protein at 2 µg/mL in Tris-  
813 Buffered Saline (TBS) pH 7.4 was coated in the 96-well microtiter plate for 1 hour at 37°C. The  
814 wells were blocked with 3% milk in TBS containing 0.05% Tween 20 (TBST) for 1 hour, then  
815 serially diluted serum samples were added (1:100 – 1:24,300) to the wells and incubated for an  
816 additional hour at 37°C. The plate was washed three times using wash buffer (TBS containing  
817 0.2% Tween 20), then respective goat anti-mouse IgG (Catalog # A16072), IgG1 (Catalog #  
818 PA1-74421), or IgG2A (Catalog # M32207) was added at 1:2000 and incubated for 1 hour at  
819 37°C. The plate was washed three times using wash buffer, then 3,3',5,5'-Tetramethylbenzidine  
820 (TMB) Liquid Substrate (Sigma-Aldrich) was added to the plate, and absorbance was measured  
821 at 450 nm using a plate reader (Molecular Devices SpectraMax ABS Plus Absorbance ELISA  
822 Microplate Reader) after stopping the reaction with 1 N HCl.

### 823 *RBD or NTD ELISA titer*

824 All serum samples tested by ELISA assay were heat-inactivated at 56°C for 30 min to reduce  
825 risk from possible residual virus in serum. ELISA binding titer for Spike RBD or NTD was  
826 measured as described above with minor modifications. 96-well microtiter plate was coated with  
827 Streptavidin (Invitrogen) at 4 µg/mL in TBS pH 7.4 for 1 hour at 37°C. The wells were blocked  
828 with 1:1 Non-Animal Protein-BLOCKER™ (G-Biosciences) in TBS for 1 hour. Biotinylated spike  
829 RBD or NTD antigen (1 µg/ml) was captured onto the streptavidin-coated wells, then serially  
830 diluted serum samples (1:100 – 1:24,300) were added to the wells and incubated for 1 hour at

831 37°C. The plate was washed three times using wash buffer (TBS containing 0.2% Tween 20),  
832 then goat anti-mouse IgG (Catalog # A16072) was added at 1:2000 and incubated for 1 hour at  
833 37°C. The plate was washed three times using wash buffer, then 3,3',5,5'-Tetramethylbenzidine  
834 (TMB) Liquid Substrate (Sigma-Aldrich) was added to the plate, and absorbance was measured  
835 at 450 nm using a plate reader (Molecular Devices SpectraMax ABS Plus Absorbance ELISA  
836 Microplate Reader) after stopping the reaction with 1 N HCl.

### 837 **Statistical testing**

838 All statistical analyses were conducted in GraphPad PRISM 9. To assess the statistical  
839 significance of weight loss, significance was calculated by two-way ANOVA comparing each  
840 spike vaccinated group to the GFP control. In cases where mortality was observed, significance  
841 was calculated via Mixed-effects analysis. The significance of virus and antibody titers was  
842 calculated via one-way ANOVA comparing each spike vaccinated group to the GFP control. To  
843 assess the significance of lung discoloration and histopathological lung damage scoring,  
844 significance was calculated via Brown-Forsythe and Welch's ANOVA. In all cases, testing was  
845 corrected for multiple comparisons using Dunnett's multiple comparisons test, Dunnett's T3 test  
846 when total samples <50. Significance reported as \*  $p < 0.05$ , \*\*  $p < 0.01$ , \*\*\*  $p < 0.001$ , \*\*\*\*  $p <$   
847  $0.0001$ .

### 848 **ACKNOWLEDGEMENTS**

849 GA and the Systems Serology Lab at Ragon are supported by Mark and Lisa Schwartz, Terry  
850 and Susan Ragon, and the SAMANA Kay MGH Research Scholars award. GA and the Systems  
851 Serology Lab also receives funding from the Massachusetts Consortium on Pathogen  
852 Readiness (MassCPR), the Gates Global Health Vaccine Accelerator Platform, and the NIH  
853 (3R37AI080289-11S1, R01AI146785, U19AI42790-01, U19AI135995-02, U19AI42790-  
854 01, P01AI165072, U01CA260476 – 01, CIVIC75N93019C00052). VKB receives funding from  
855 NIH grant K01OD026529. RSB and MTH receive funding from NIH grant P01AI158571. RSB  
856 receives funding from NIH/NCI North Carolina Seronet Center for Excellence grant U54  
857 CA260543. LEA is supported in part by NIH 2T32AI007419-26 Molecular Biology of Viral  
858 Diseases Predoctoral Training Grant. This project was also supported in part by the North  
859 Carolina Policy Collaboratory at the University of North Carolina at Chapel Hill with funding from  
860 the North Carolina Coronavirus Relief Fund established and appropriated by the North Carolina  
861 General Assembly. We would like to also thank Sharon Taft-Benz for valuable input  
862 coordinating, directing, and managing studies in ABSL3 facilities.

863 **DISCLOSURES**

864 GA is a founder/equity holder in Seroymx Systems and Leyden Labs. GA has served as a  
865 scientific advisor for Sanofi Vaccines. GA has collaborative agreements with GSK, Merck,  
866 Abbvie, Sanofi, Medicago, BioNtech, Moderna, BMS, Novavax, SK Biosciences, Gilead, and  
867 Sanaria.

868 **REFERENCES**

- 869 1. P. A. Rota, *et al.*, Characterization of a novel coronavirus associated with severe acute  
870 respiratory syndrome. *Science* **300**, 1394–1399 (2003).
- 871 2. P. Zhou, *et al.*, A pneumonia outbreak associated with a new coronavirus of probable bat  
872 origin. *Nature* **579**, 270–273 (2020).
- 873 3. V. D. Menachery, *et al.*, SARS-like WIV1-CoV poised for human emergence. *Proceedings of*  
874 *the National Academy of Sciences* **113**, 3048–3053 (2016).
- 875 4. V. D. Menachery, *et al.*, A SARS-like cluster of circulating bat coronaviruses shows potential  
876 for human emergence. *Nature Medicine* **21**, 1508–1513 (2015).
- 877 5. S. K. P. Lau, *et al.*, Severe acute respiratory syndrome coronavirus-like virus in Chinese  
878 horseshoe bats. *PNAS* **102**, 14040–14045 (2005).
- 879 6. W. Li, *et al.*, Bats Are Natural Reservoirs of SARS-Like Coronaviruses. *Science* **310**, 676–679  
880 (2005).
- 881 7. S. Temmam, *et al.*, Bat coronaviruses related to SARS-CoV-2 and infectious for human cells.  
882 *Nature* (2022) <https://doi.org/10.1038/s41586-022-04532-4> (February 16, 2022).
- 883 8. R. Arya, *et al.*, Structural insights into SARS-CoV-2 proteins. *J Mol Biol* **433**, 166725 (2021).
- 884 9. L. E. Adams, *et al.*, Critical ACE2 Determinants of SARS-CoV-2 and Group 2B Coronavirus  
885 Infection and Replication. *mBio* **12** (2021).
- 886 10. Y. Wan, J. Shang, R. Graham, R. S. Baric, F. Li, Receptor Recognition by the Novel  
887 Coronavirus from Wuhan: an Analysis Based on Decade-Long Structural Studies of SARS  
888 Coronavirus. *Journal of Virology* **94**, e00127-20 (2020).
- 889 11. M. M. Becker, *et al.*, Synthetic recombinant bat SARS-like coronavirus is infectious in  
890 cultured cells and in mice. *Proc Natl Acad Sci U S A* **105**, 19944–19949 (2008).
- 891 12. K. S. Corbett, *et al.*, SARS-CoV-2 mRNA vaccine design enabled by prototype pathogen  
892 preparedness. *Nature* **586**, 567–571 (2020).
- 893 13. D. Laczko, *et al.*, A Single Immunization with Nucleoside-Modified mRNA Vaccines Elicits  
894 Strong Cellular and Humoral Immune Responses against SARS-CoV-2 in Mice. *Immunity* **53**,  
895 724-732.e7 (2020).
- 896 14. J. Lu, *et al.*, A COVID-19 mRNA vaccine encoding SARS-CoV-2 virus-like particles induces a  
897 strong antiviral-like immune response in mice. *Cell Res* **30**, 936–939 (2020).
- 898 15. D. W. Hawman, *et al.*, SARS-CoV2 variant-specific replicating RNA vaccines protect from  
899 disease following challenge with heterologous variants of concern. *Elife* **11**, e75537 (2022).

- 900 16. J. H. Erasmus, *et al.*, An Alphavirus-derived replicon RNA vaccine induces SARS-CoV-2  
901 neutralizing antibody and T cell responses in mice and nonhuman primates. *Sci Transl Med*  
902 **12**, eabc9396 (2020).
- 903 17. G. Palladino, *et al.*, Self-amplifying mRNA SARS-CoV-2 vaccines raise cross-reactive  
904 immune response to variants and prevent infection in animal models. *Molecular Therapy -*  
905 *Methods & Clinical Development* **25**, 225–235 (2022).
- 906 18. D. R. Martinez, *et al.*, Chimeric spike mRNA vaccines protect against Sarbecovirus  
907 challenge in mice. *Science* **373**, 991–998 (2021).
- 908 19. F. A. Olotu, K. F. Omolabi, M. E. S. Soliman, Leaving no stone unturned: Allosteric targeting  
909 of SARS-CoV-2 spike protein at putative druggable sites disrupts human angiotensin-  
910 converting enzyme interactions at the receptor binding domain. *Informatics in Medicine*  
911 *Unlocked* **21**, 100451 (2020).
- 912 20. M. A. Díaz-Salinas, *et al.*, Conformational dynamics and allosteric modulation of the SARS-  
913 CoV-2 spike. *eLife* **11**, e75433 (2022).
- 914 21. A. O. Hassan, *et al.*, A SARS-CoV-2 Infection Model in Mice Demonstrates Protection by  
915 Neutralizing Antibodies. *Cell* **182**, 744-753.e4 (2020).
- 916 22. J. Mateus, *et al.*, Selective and cross-reactive SARS-CoV-2 T cell epitopes in unexposed  
917 humans. *Science* **370**, 89–94 (2020).
- 918 23. Y. Zhu, *et al.*, Cross-reactive neutralization of SARS-CoV-2 by serum antibodies from  
919 recovered SARS patients and immunized animals. *Science Advances* **6**, eabc9999 (2020).
- 920 24. X. Xie, *et al.*, Neutralization of SARS-CoV-2 spike 69/70 deletion, E484K and N501Y variants  
921 by BNT162b2 vaccine-elicited sera. *Nat Med* **27**, 620–621 (2021).
- 922 25. C. G. Rappazzo, *et al.*, Broad and potent activity against SARS-like viruses by an engineered  
923 human monoclonal antibody. *Science* **371**, 823–829 (2021).
- 924 26. A. Nelde, *et al.*, SARS-CoV-2 T-cell epitopes define heterologous and COVID-19-induced T-  
925 cell recognition (2021) <https://doi.org/10.21203/rs.3.rs-35331/v1> (July 30, 2021).
- 926 27. L. Liu, *et al.*, Potent neutralizing antibodies against multiple epitopes on SARS-CoV-2 spike.  
927 *Nature* **584**, 450–456 (2020).
- 928 28. D. Pinto, *et al.*, Cross-neutralization of SARS-CoV-2 by a human monoclonal SARS-CoV  
929 antibody. *Nature* **583**, 290–295 (2020).
- 930 29. D. Li, *et al.*, In vitro and in vivo functions of SARS-CoV-2 infection-enhancing and  
931 neutralizing antibodies. *Cell*, S009286742100756X (2021).

- 932 30. D. Li, G. D. Sempowski, K. O. Saunders, P. Acharya, B. F. Haynes, SARS-CoV-2 Neutralizing  
933 Antibodies for COVID-19 Prevention and Treatment. *Annual Review of Medicine* **73**, null  
934 (2022).
- 935 31. J. R. R. Whittle, *et al.*, Broadly neutralizing human antibody that recognizes the receptor-  
936 binding pocket of influenza virus hemagglutinin. *Proc Natl Acad Sci U S A* **108**, 14216–  
937 14221 (2011).
- 938 32. Z. Wang, *et al.*, Conserved Neutralizing Epitopes on the N-Terminal Domain of Variant  
939 SARS-CoV-2 Spike Proteins. *bioRxiv*, 2022.02.01.478695 (2022).
- 940 33. K. M. Hastie, *et al.*, Defining variant-resistant epitopes targeted by SARS-CoV-2 antibodies:  
941 A global consortium study. *Science* **374**, 472–478 (2021).
- 942 34. D. R. Martinez, *et al.*, A broadly cross-reactive antibody neutralizes and protects against  
943 sarbecovirus challenge in mice. *Science Translational Medicine* (2021)  
944 <https://doi.org/10.1126/scitranslmed.abj7125> (January 18, 2022).
- 945 35. R. Yamin, *et al.*, Fc-engineered antibody therapeutics with improved anti-SARS-CoV-2  
946 efficacy. *Nature*, 1–6 (2021).
- 947 36. A. Tauzin, *et al.*, A single dose of the SARS-CoV-2 vaccine BNT162b2 elicits Fc-mediated  
948 antibody effector functions and T cell responses. *Cell Host & Microbe* **29**, 1137–1150.e6  
949 (2021).
- 950 37. Y. C. Bartsch, *et al.*, Humoral signatures of protective and pathological SARS-CoV-2  
951 infection in children. *Nat Med* **27**, 454–462 (2021).
- 952 38. C. E. Z. Chan, *et al.*, The Fc-mediated effector functions of a potent SARS-CoV-2  
953 neutralizing antibody, SC31, isolated from an early convalescent COVID-19 patient, are  
954 essential for the optimal therapeutic efficacy of the antibody. *PLOS ONE* **16**, e0253487  
955 (2021).
- 956 39. P. Kaplonek, *et al.*, mRNA-1273 vaccine-induced antibodies maintain Fc effector functions  
957 across SARS-CoV-2 variants of concern. *Immunity* **55**, 355–365.e4 (2022).
- 958 40. P. Bruhns, F. Jönsson, Mouse and human FcR effector functions. *Immunol Rev* **268**, 25–51  
959 (2015).
- 960 41. S. Agnihothram, *et al.*, Development of a Broadly Accessible Venezuelan Equine  
961 Encephalitis Virus Replicon Particle Vaccine Platform. *Journal of Virology* **92** (2018).
- 962 42. S. R. Leist, *et al.*, A Mouse-adapted SARS-CoV-2 induces Acute Lung Injury (ALI) and  
963 mortality in Standard Laboratory Mice. *Cell* **183**, 1070–1085 (2020).



- 964 43. K. H. Dinno, *et al.*, A mouse-adapted model of SARS-CoV-2 to test COVID-19  
965 countermeasures. *Nature* **586**, 560–566 (2020).
- 966 44. D. Deming, *et al.*, Vaccine Efficacy in Senescent Mice Challenged with Recombinant SARS-  
967 CoV Bearing Epidemic and Zoonotic Spike Variants. *PLOS Medicine* **3**, e525 (2006).
- 968 45. A. W. Chung, *et al.*, Dissecting Polyclonal Vaccine-Induced Humoral Immunity against HIV  
969 Using Systems Serology. *Cell* **163**, 988–998 (2015).
- 970 46. M. F. Boni, *et al.*, Evolutionary origins of the SARS-CoV-2 sarbecovirus lineage responsible  
971 for the COVID-19 pandemic. *Nat Microbiol* **5**, 1408–1417 (2020).
- 972 47. A. T. DiPiazza, *et al.*, COVID-19 vaccine mRNA-1273 elicits a protective immune profile in  
973 mice that is not associated with vaccine-enhanced disease upon SARS-CoV-2 challenge.  
974 *Immunity* **54**, 1869-1882.e6 (2021).
- 975 48. V. D. Menachery, L. E. Gralinski, R. S. Baric, M. T. Ferris, New Metrics for Evaluating Viral  
976 Respiratory Pathogenesis. *PLoS One* **10** (2015).
- 977 49. E. S. Geanes, *et al.*, Cross-reactive antibodies elicited to conserved epitopes on SARS-CoV-2  
978 spike protein after infection and vaccination. *Sci Rep* **12**, 6496 (2022).
- 979 50. C. Wang, *et al.*, A conserved immunogenic and vulnerable site on the coronavirus spike  
980 protein delineated by cross-reactive monoclonal antibodies. *Nat Commun* **12**, 1715 (2021).
- 981 51. M. Bolles, *et al.*, A Double-Inactivated Severe Acute Respiratory Syndrome Coronavirus  
982 Vaccine Provides Incomplete Protection in Mice and Induces Increased Eosinophilic  
983 Proinflammatory Pulmonary Response upon Challenge. *J Virol* **85**, 12201–12215 (2011).
- 984 52. S. Murakami, *et al.*, Isolation of bat sarbecoviruses of SARS-CoV-2 clade, Japan. *bioRxiv*,  
985 2022.05.16.492045 (2022).
- 986 53. A. Schäfer, *et al.*, A Multitrait Locus Regulates Sarbecovirus Pathogenesis. *mBio* **0**, e01454-  
987 22 (2022).
- 988 54. E. Alebrahim-Dehkordi, *et al.*, T helper type (Th1/Th2) responses to SARS-CoV-2 and  
989 influenza A (H1N1) virus: From cytokines produced to immune responses. *Transpl*  
990 *Immunol* **70**, 101495 (2022).
- 991 55. S. Fischinger, *et al.*, A high-throughput, bead-based, antigen-specific assay to assess the  
992 ability of antibodies to induce complement activation. *Journal of Immunological Methods*  
993 **473**, 112630 (2019).
- 994 56. A. Pegu, *et al.*, Durability of mRNA-1273 vaccine-induced antibodies against SARS-CoV-2  
995 variants. *Science* **373**, 1372–1377 (2021).

- 996 57. C. S. Tan, *et al.*, Durability of Heterologous and Homologous COVID-19 Vaccine Boosts.  
997 *JAMA Network Open* **5**, e2226335 (2022).
- 998 58. H. L. Dugan, *et al.*, Profiling B cell immunodominance after SARS-CoV-2 infection reveals  
999 antibody evolution to non-neutralizing viral targets. *Immunity* (2021)  
1000 <https://doi.org/10.1016/j.immuni.2021.05.001> (May 27, 2021).
- 1001 59. J. Zhao, *et al.*, Airway Memory CD4+ T Cells Mediate Protective Immunity against Emerging  
1002 Respiratory Coronaviruses. *Immunity* **44**, 1379–1391 (2016).
- 1003 60. A. J. Greaney, *et al.*, Antibodies elicited by mRNA-1273 vaccination bind more broadly to  
1004 the receptor binding domain than do those from SARS-CoV-2 infection. *Science*  
1005 *Translational Medicine* **13**, eabi9915 (2021).
- 1006 61. L. Min, Q. Sun, Antibodies and Vaccines Target RBD of SARS-CoV-2. *Frontiers in Molecular*  
1007 *Biosciences* **8** (2021).
- 1008 62. W. N. Voss, *et al.*, Prevalent, protective, and convergent IgG recognition of SARS-CoV-2  
1009 non-RBD spike epitopes. *Science* **372**, 1108–1112 (2021).
- 1010 63. S. Prakash, *et al.*, Genome-Wide B Cell, CD4+, and CD8+ T Cell Epitopes That Are Highly  
1011 Conserved between Human and Animal Coronaviruses, Identified from SARS-CoV-2 as  
1012 Targets for Preemptive Pan-Coronavirus Vaccines. *The Journal of Immunology* **206**, 2566–  
1013 2582 (2021).
- 1014 64. M. M. Sauer, *et al.*, Structural basis for broad coronavirus neutralization. *Nat Struct Mol*  
1015 *Biol* **28**, 478–486 (2021).
- 1016 65. L. Dai, *et al.*, A Universal Design of Betacoronavirus Vaccines against COVID-19, MERS, and  
1017 SARS. *Cell* **182**, 722-733.e11 (2020).
- 1018 66. A. A. Cohen, *et al.*, Mosaic nanoparticles elicit cross-reactive immune responses to  
1019 zoonotic coronaviruses in mice. *Science* **371**, 735–741 (2021).
- 1020 67. X.-N. Li, *et al.*, Effectiveness of inactivated SARS-CoV-2 vaccines against the Delta variant  
1021 infection in Guangzhou: a test-negative case-control real-world study. *Emerg Microbes*  
1022 *Infect* **10**, 1751–1759 (2021).
- 1023 68. K. B. Pouwels, *et al.*, “Impact of Delta on viral burden and vaccine effectiveness against  
1024 new SARS-CoV-2 infections in the UK” (Epidemiology, 2021)  
1025 <https://doi.org/10.1101/2021.08.18.21262237> (September 14, 2021).
- 1026 69. A. Puranik, *et al.*, Comparison of two highly-effective mRNA vaccines for COVID-19 during  
1027 periods of Alpha and Delta variant prevalence. *medRxiv*, 2021.08.06.21261707 (2021).

- 1028 70. H. M. Scobie, Monitoring Incidence of COVID-19 Cases, Hospitalizations, and Deaths, by  
1029 Vaccination Status — 13 U.S. Jurisdictions, April 4–July 17, 2021. *MMWR Morb Mortal*  
1030 *Wkly Rep* **70** (2021).
- 1031 71. R. E. Sealy, J. L. Hurwitz, Cross-Reactive Immune Responses toward the Common Cold  
1032 Human Coronaviruses and Severe Acute Respiratory Syndrome Coronavirus 2 (SARS-CoV-  
1033 2): Mini-Review and a Murine Study. *Microorganisms* **9**, 1643 (2021).
- 1034 72. M. Grobben, *et al.*, Cross-reactive antibodies after SARS-CoV-2 infection and vaccination.  
1035 *eLife* **10**, e70330.
- 1036 73. S. Klompus, *et al.*, Cross-reactive antibodies against human coronaviruses and the animal  
1037 coronavirome suggest diagnostics for future zoonotic spillovers. *Science Immunology* **6**,  
1038 eabe9950 (2021).
- 1039 74. C. Dacon, *et al.*, Broadly neutralizing antibodies target the coronavirus fusion peptide.  
1040 *Science* **0**, eabq3773 (2022).
- 1041 75. Y. C. Bartsch, *et al.*, Omicron variant Spike-specific antibody binding and Fc activity are  
1042 preserved in recipients of mRNA or inactivated COVID-19 vaccines. *Sci Transl Med* **14**,  
1043 eabn9243 (2022).
- 1044 76. P. Shah, G. A. Canziani, E. P. Carter, I. Chaiken, The Case for S2: The Potential Benefits of  
1045 the S2 Subunit of the SARS-CoV-2 Spike Protein as an Immunogen in Fighting the COVID-19  
1046 Pandemic. *Frontiers in Immunology* **12**, 508 (2021).
- 1047 77. D. Weiskopf, B. Weinberger, B. Grubeck-Loebenstein, The aging of the immune system.  
1048 *Transplant International* **22**, 1041–1050 (2009).
- 1049 78. T. Fülöp, G. Fóris, I. Wórum, A. Leövey, Age-dependent alterations of Fc gamma receptor-  
1050 mediated effector functions of human polymorphonuclear leucocytes. *Clin Exp Immunol*  
1051 **61**, 425–432 (1985).
- 1052 79. S. R. Simmons, M. Bhalla, S. E. Herring, E. Y. I. Tchalla, E. N. Bou Ghanem, Older but Not  
1053 Wiser: the Age-Driven Changes in Neutrophil Responses during Pulmonary Infections.  
1054 *Infect Immun* **89**, e00653-20 (2021).
- 1055 80. N. Rosenthal, S. Brown, The mouse ascending: perspectives for human-disease models.  
1056 *Nat Cell Biol* **9**, 993–999 (2007).
- 1057 81. S.-H. Sun, *et al.*, A Mouse Model of SARS-CoV-2 Infection and Pathogenesis. *Cell Host &*  
1058 *Microbe* **28**, 124-133.e4 (2020).
- 1059 82. A. S. Cockrell, *et al.*, A mouse model for MERS coronavirus-induced acute respiratory  
1060 distress syndrome. *Nature Microbiology* **2**, 1–11 (2016).

- 1061 83. L. J. White, *et al.*, An alphavirus vector-based tetravalent dengue vaccine induces a rapid  
1062 and protective immune response in macaques that differs qualitatively from immunity  
1063 induced by live virus infection. *J Virol* **87**, 3409–3424 (2013).
- 1064 84. N. L. Davis, *et al.*, Alphavirus Replicon Particles as Candidate HIV Vaccines. *IUBMB Life* **53**,  
1065 209–211 (2002).
- 1066 85. M. Wecker, *et al.*, Phase I safety and immunogenicity evaluations of an alphavirus replicon  
1067 HIV-1 subtype C gag vaccine in healthy HIV-1-uninfected adults. *Clin Vaccine Immunol* **19**,  
1068 1651–1660 (2012).
- 1069 86. K. Lundstrom, Alphavirus-Based Vaccines. *Viruses* **6**, 2392–2415 (2014).
- 1070 87. C. M. Boudreau, G. Alter, Extra-Neutralizing FcR-Mediated Antibody Functions for a  
1071 Universal Influenza Vaccine. *Frontiers in Immunology* **10** (2019).
- 1072 88. S. Jegaskanda, The Potential Role of Fc-Receptor Functions in the Development of a  
1073 Universal Influenza Vaccine. *Vaccines (Basel)* **6**, 27 (2018).
- 1074 89. C. M. Boudreau, *et al.*, Dissecting Fc signatures of protection in neonates following  
1075 maternal influenza vaccination in a placebo-controlled trial. *Cell Reports* **38**, 110337  
1076 (2022).
- 1077 90. A. G. Dias, *et al.*, Antibody Fc characteristics and effector functions correlate with  
1078 protection from symptomatic dengue virus type 3 infection. *Science Translational*  
1079 *Medicine* **14**, eabm3151 (2022).
- 1080 91. Q. He, *et al.*, Immunogenicity and protective efficacy of a recombinant protein subunit  
1081 vaccine and an inactivated vaccine against SARS-CoV-2 variants in non-human primates.  
1082 *Sig Transduct Target Ther* **7**, 1–11 (2022).
- 1083 92. S. Bournazos, J. V. Ravetch, Fcγ Receptor Function and the Design of Vaccination  
1084 Strategies. *Immunity* **47**, 224–233 (2017).
- 1085 93. T. T. Wang, *et al.*, Anti-HA Glycoforms Drive B Cell Affinity Selection and Determine  
1086 Influenza Vaccine Efficacy. *Cell* **162**, 160–169 (2015).
- 1087 94. D. J. DiLillo, J. V. Ravetch, Differential Fc-Receptor Engagement Drives an Anti-tumor  
1088 Vaccinal Effect. *Cell* **161**, 1035–1045 (2015).
- 1089 95. L. E. Gralinski, *et al.*, Genome Wide Identification of SARS-CoV Susceptibility Loci Using the  
1090 Collaborative Cross. *PLoS Genet* **11**, e1005504 (2015).
- 1091 96. K. E. Noll, M. T. Ferris, M. T. Heise, The Collaborative Cross: A Systems Genetics Resource  
1092 for Studying Host-Pathogen Interactions. *Cell Host & Microbe* **25**, 484–498 (2019).

- 1093 97. C. E. Edwards, *et al.*, Swine acute diarrhea syndrome coronavirus replication in primary  
1094 human cells reveals potential susceptibility to infection. *Proc Natl Acad Sci U S A* **117**,  
1095 26915–26925 (2020).
- 1096 98. Y. J. Hou, *et al.*, SARS-CoV-2 Reverse Genetics Reveals a Variable Infection Gradient in the  
1097 Respiratory Tract. *Cell* **182**, 429-446.e14 (2020).
- 1098 99. M. Prentiss, A. Chu, K. K. Berggren, Finding the infectious dose for COVID-19 by applying  
1099 an airborne-transmission model to superspreader events. *PLoS One* **17**, e0265816 (2022).
- 1100 100. E. P. Brown, *et al.*, Multiplexed Fc array for evaluation of antigen-specific antibody effector  
1101 profiles. *J Immunol Methods* **443**, 33–44 (2017).
- 1102 101. G. Lofano, *et al.*, Antigen-specific antibody Fc glycosylation enhances humoral immunity  
1103 via the recruitment of complement. *Sci Immunol* **3**, eaat7796 (2018).
- 1104 102. T. M. Narowski, *et al.*, SARS-CoV-2 mRNA vaccine induces robust specific and cross-  
1105 reactive IgG and unequal neutralizing antibodies in naive and previously infected people.  
1106 *Cell Rep* **38**, 110336 (2022).
- 1107

# 1. Venezuelan Equine Encephalitis Virus Replicon Particle VRP3526 for high-titer vaccinations

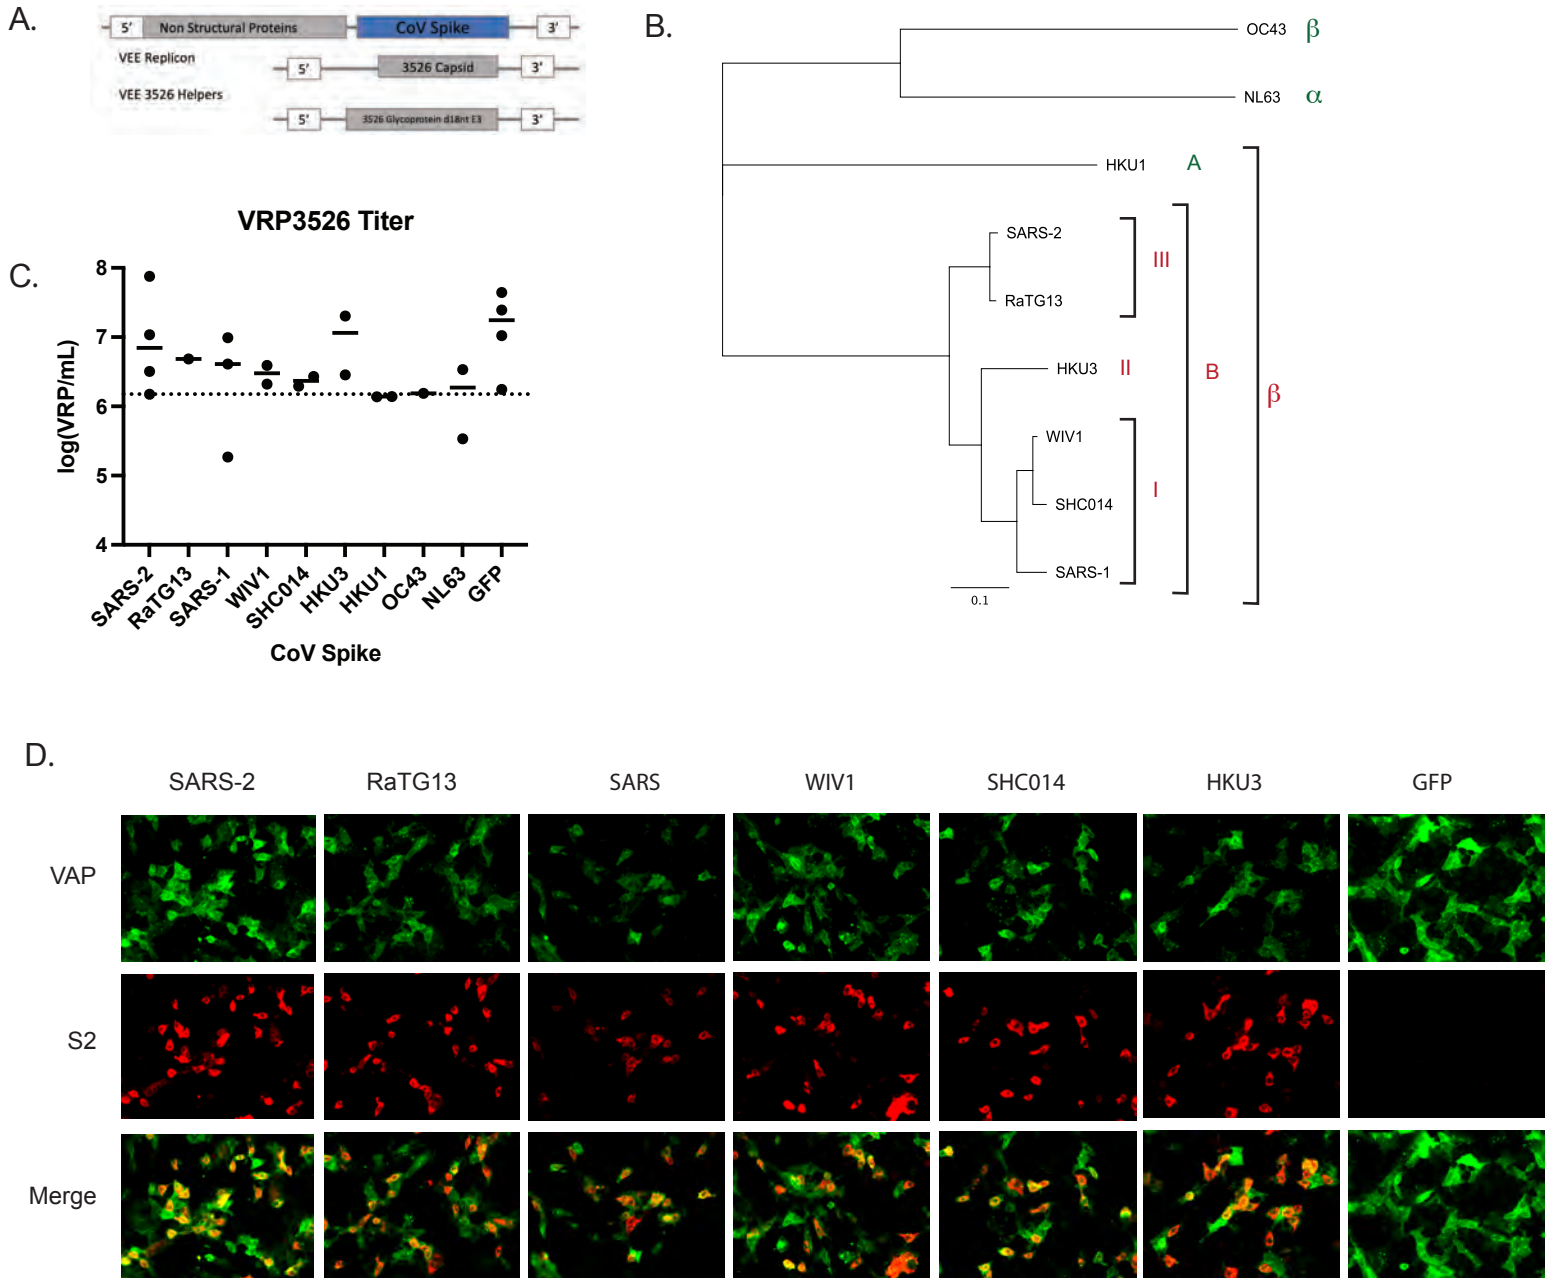

## 2. VRP Sarbecovirus spike vaccines are cross-protective against SARS-CoV-2 lethal disease

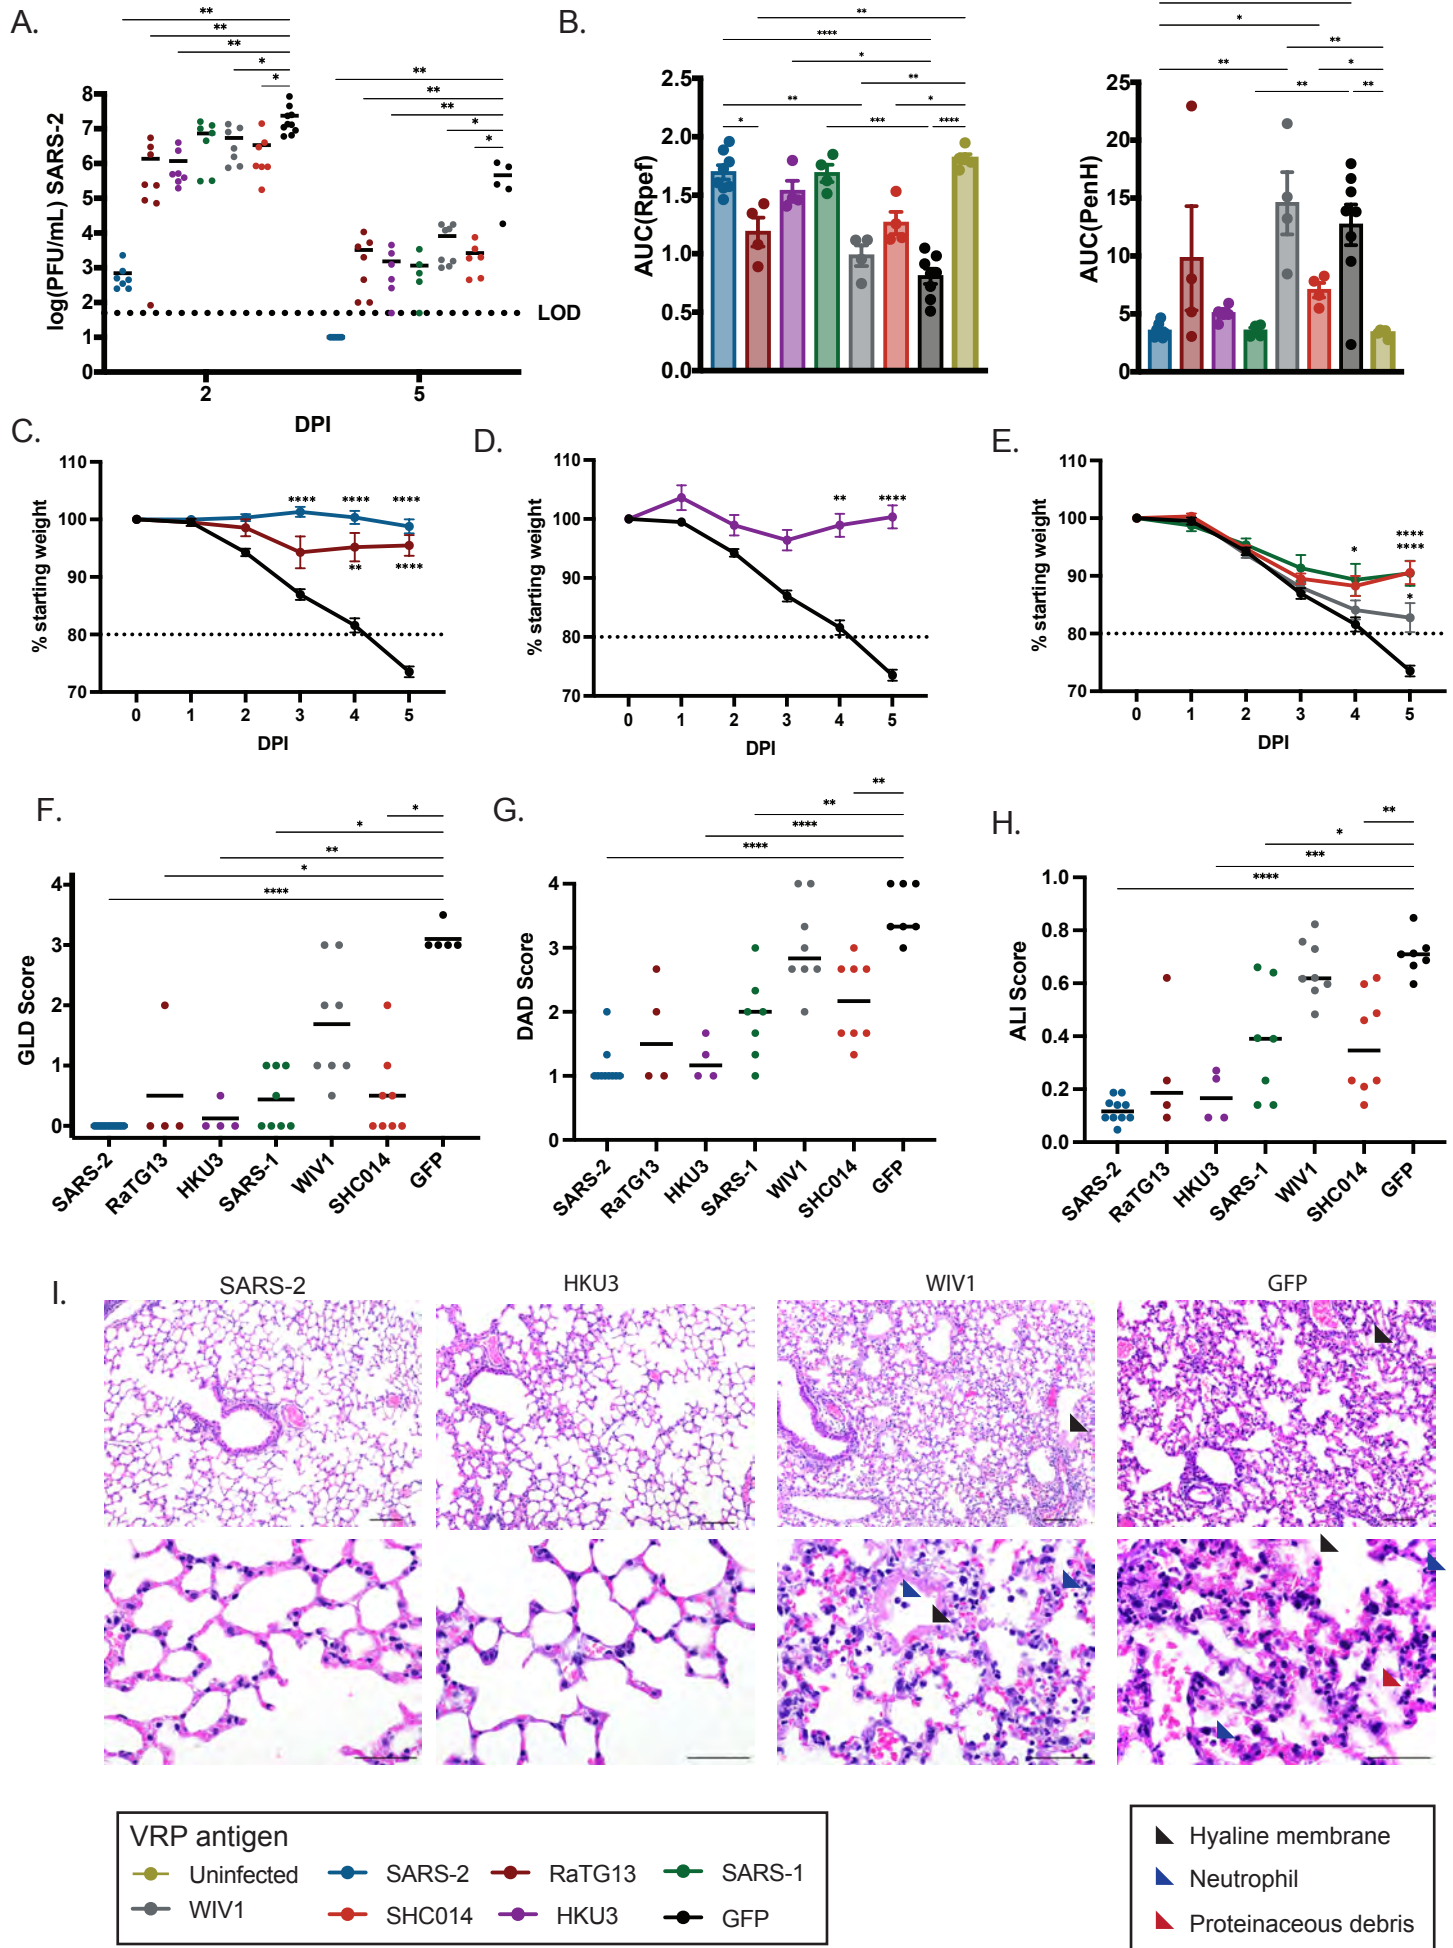

### 3. VRP Spike protects from lethal infection in vulnerable aged mice

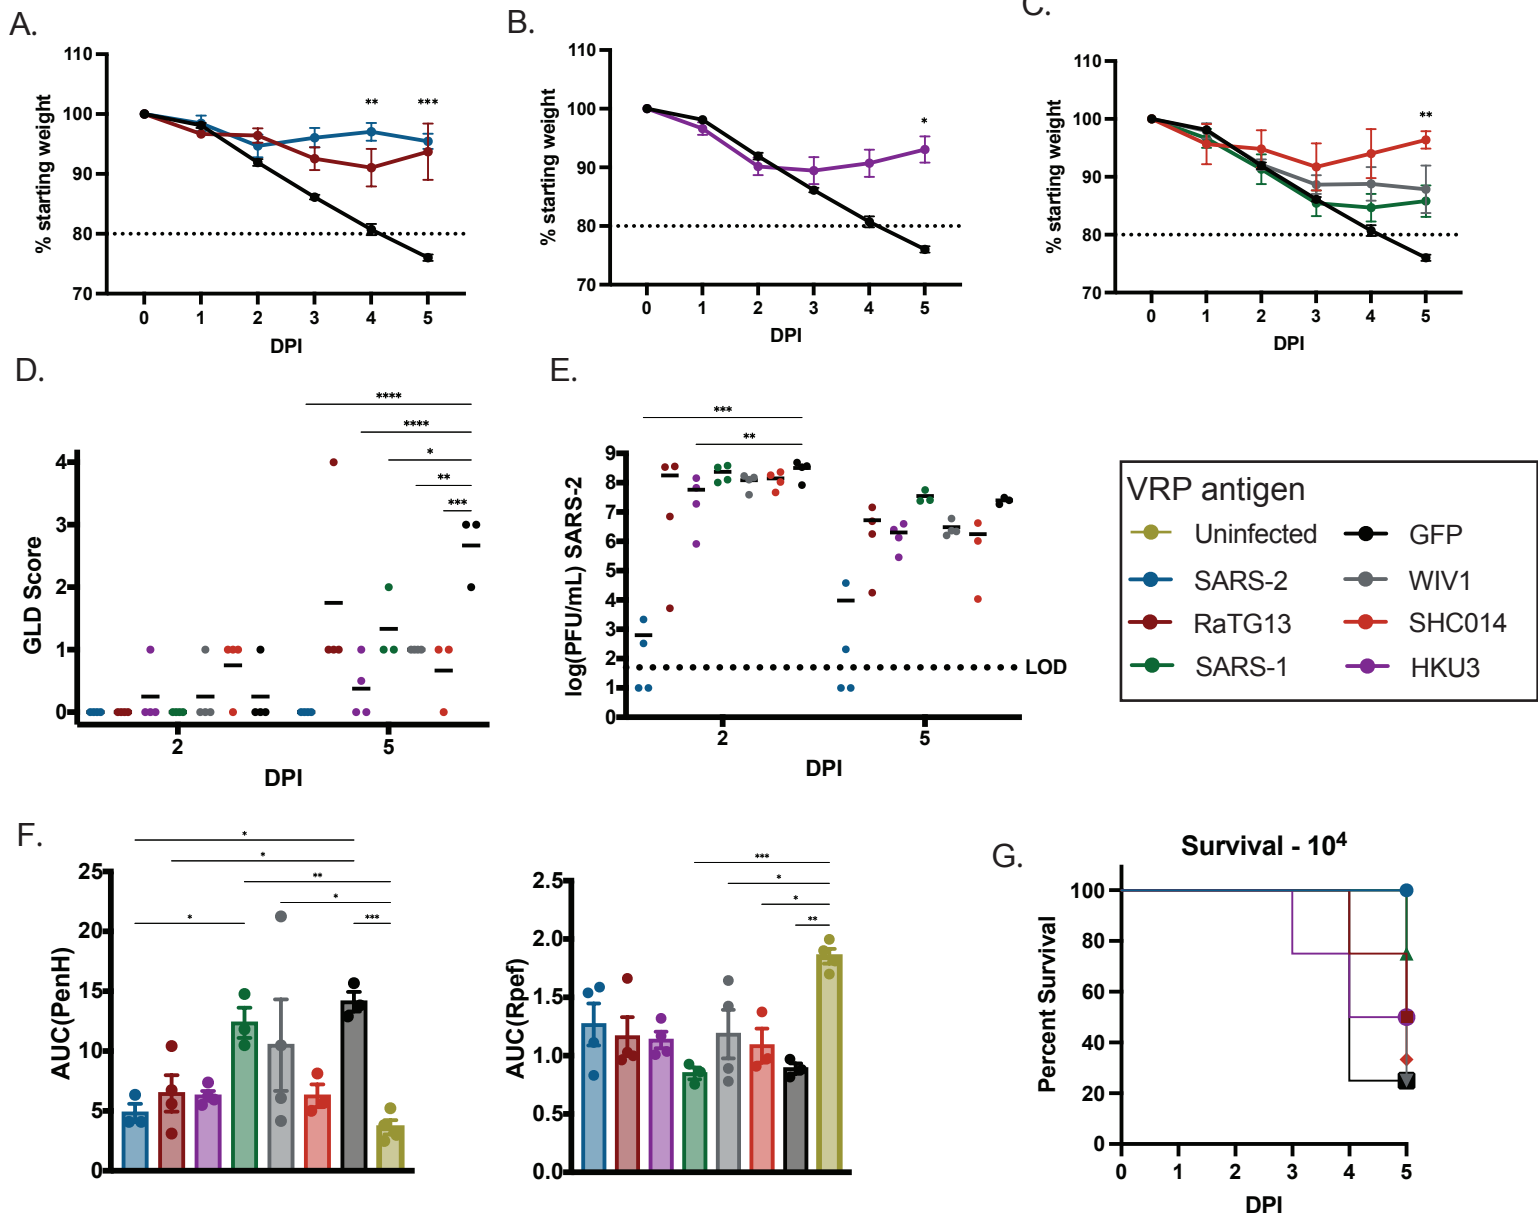



#### 4. VRP SARS-2 spike vaccination protects against heterologous challenge

A.

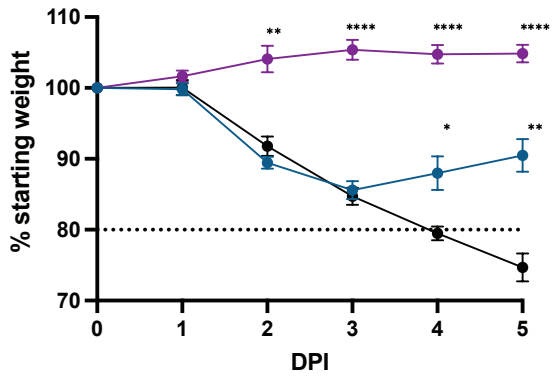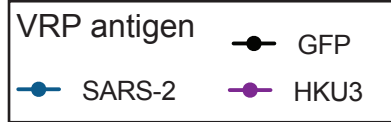

B.

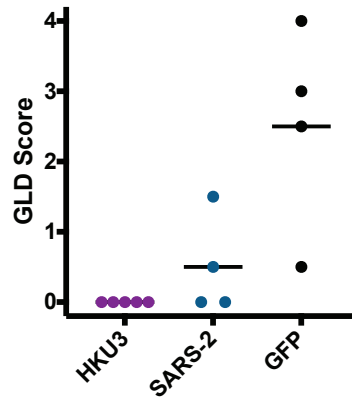

C.

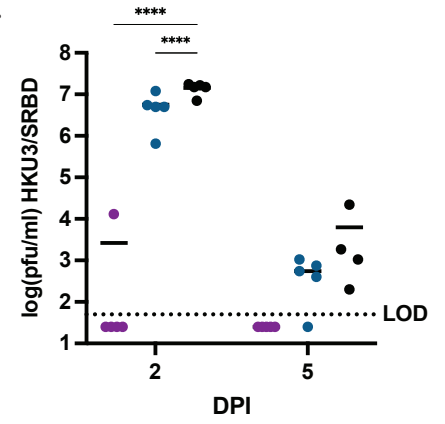

## 5. Characterizing the antibody response through systems serology and functional assays

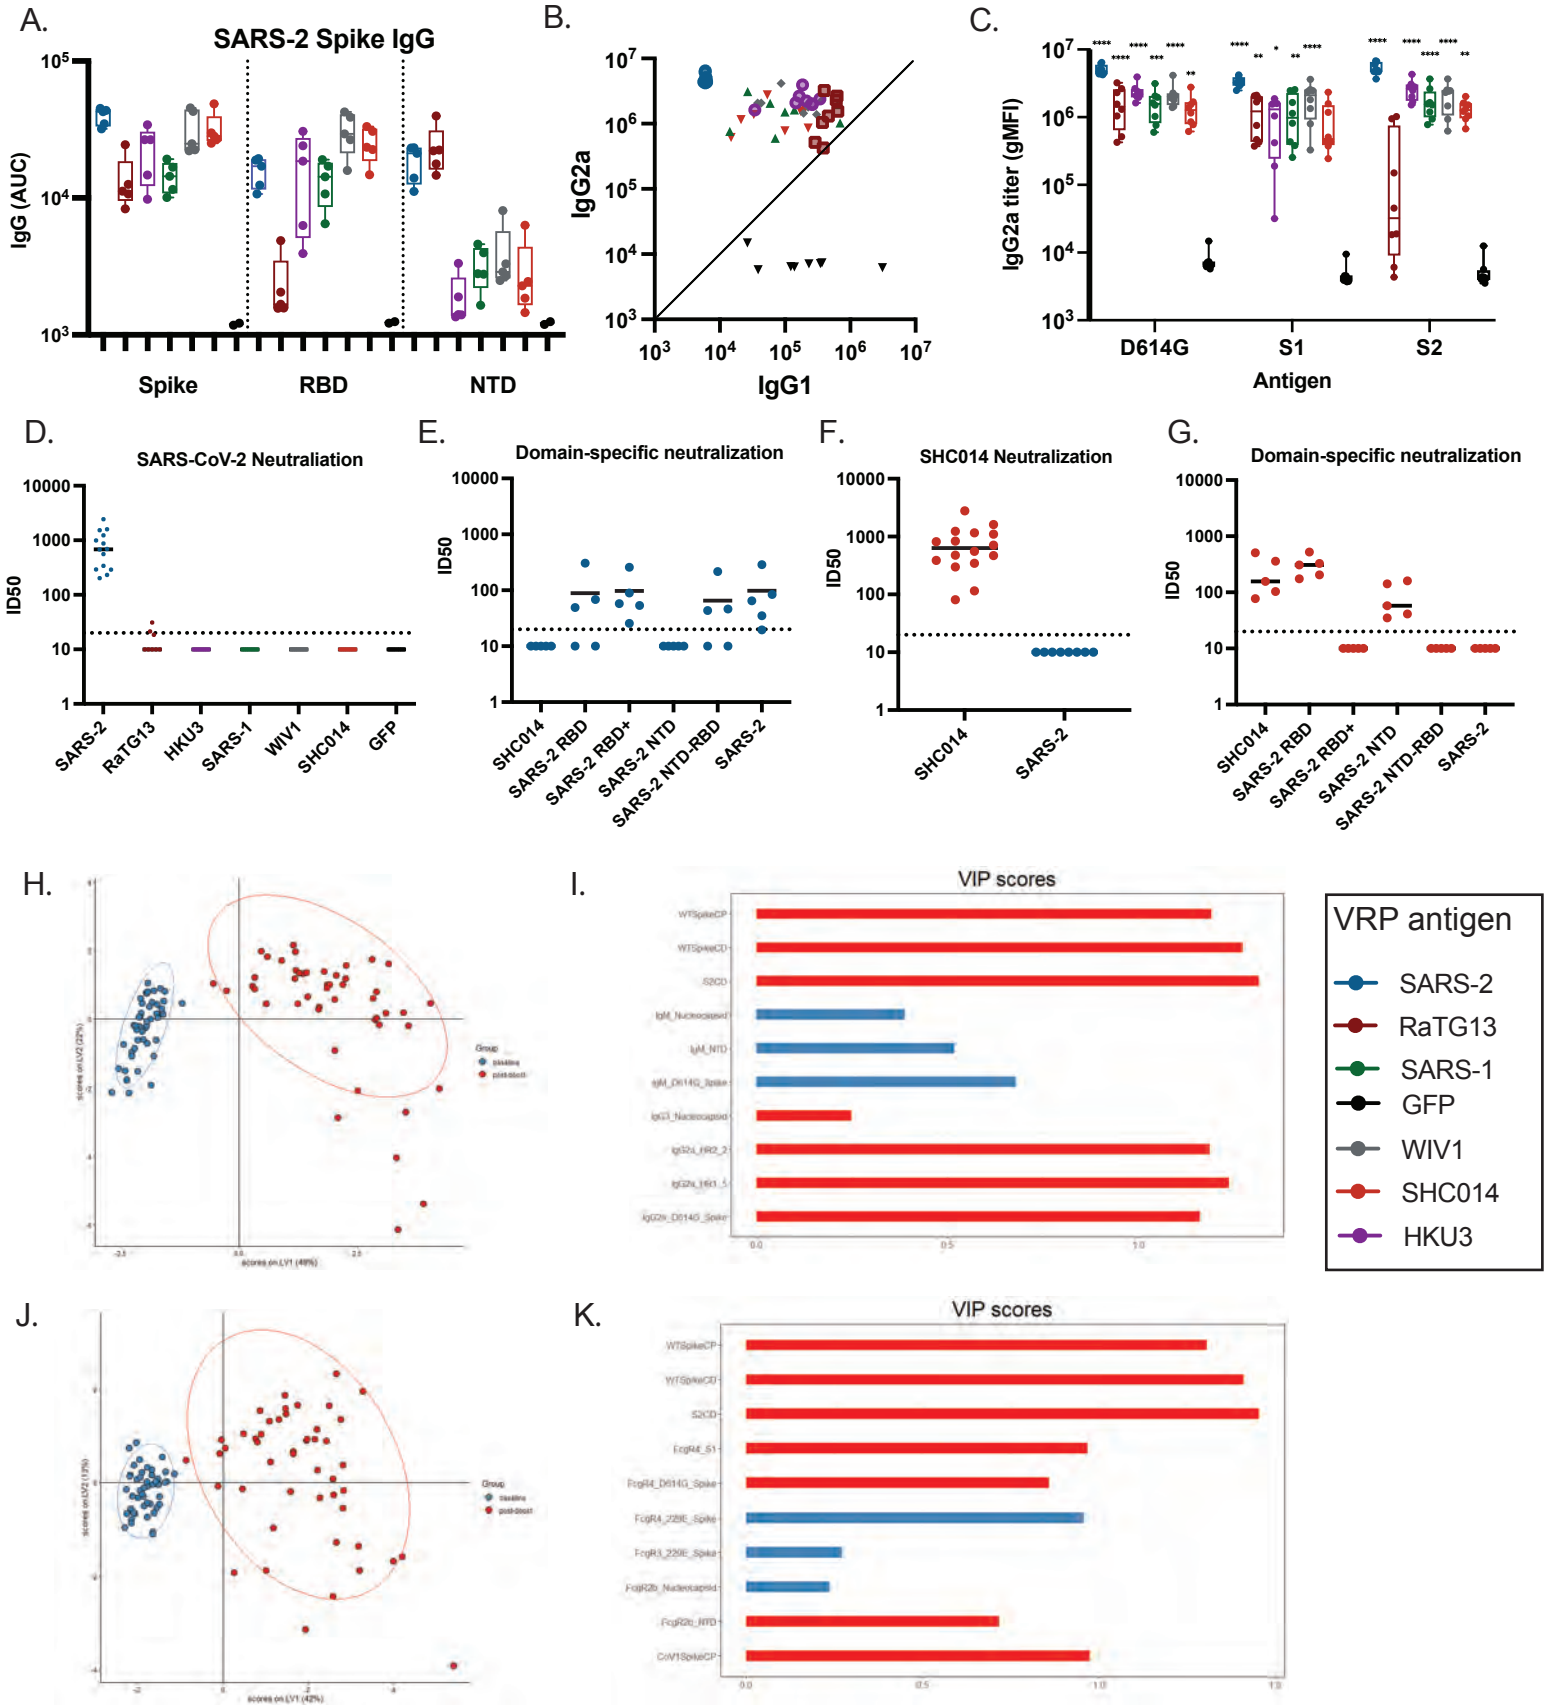

## 6. Non-neutralizing antibodies mediate protection *in vivo* through Fc function

**A.**

|       |       | IgG2a                            |                                    |                                                      |        |                  |                          |                  |                  |
|-------|-------|----------------------------------|------------------------------------|------------------------------------------------------|--------|------------------|--------------------------|------------------|------------------|
|       |       | Spike                            | S1                                 | S2                                                   | NTD    | HR1              | HR2                      | FP               | Stalk            |
| ADCP  | Spike |                                  |                                    | HKU3<br>SARS-1<br>WIV1                               |        |                  |                          |                  |                  |
|       | S2    |                                  |                                    | HKU3<br>SARS-1<br>WIV1                               |        |                  |                          |                  |                  |
| ADNP  | Spike |                                  |                                    | HKU3<br>SARS-1<br>WIV1                               |        |                  | SHC014<br>WIV1           |                  | SHC014           |
|       | S2    |                                  |                                    | HKU3<br>SARS-1<br>WIV1                               |        |                  | WIV1                     | HKU3             | SHC014           |
| ADCD  | Spike |                                  |                                    | HKU3<br>SARS-2                                       |        | SARS-2           | RaTG13                   |                  |                  |
|       | S2    |                                  |                                    | RaTG13                                               |        |                  |                          |                  |                  |
| FcγR3 | Spike | HKU3<br>RaTG13<br>WIV1<br>SARS-2 |                                    | SARS-2                                               |        | SARS-2           |                          |                  |                  |
|       | S1    | SARS-1                           | RaTG13                             |                                                      |        |                  |                          |                  |                  |
| FcγR4 | Spike | HKU3<br>RaTG13<br>WIV1<br>SARS-2 | RaTG13                             |                                                      | RaTG13 | SARS-2           | SHC014                   | SARS-2           | SARS-2           |
|       | S1    | SHC014<br>SARS-1<br>WIV1         | HKU3<br>RaTG13<br>SHC014<br>SARS-1 |                                                      | RaTG13 | SARS-2           |                          | SARS-2           |                  |
|       | S2    | SARS-2                           |                                    | HKU3<br>RaTG13<br>SHC014<br>SARS-1<br>WIV1<br>SARS-2 |        | SARS-1<br>SARS-2 | SARS-1<br>WIV1<br>SARS-2 | SARS-1<br>SARS-2 | SARS-1<br>SARS-2 |
|       | NTD   |                                  |                                    |                                                      | RaTG13 | SARS-2           |                          | SARS-2           |                  |

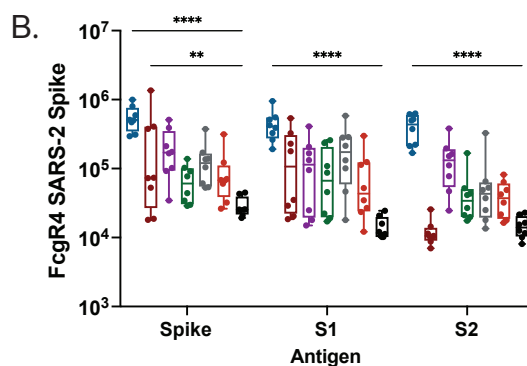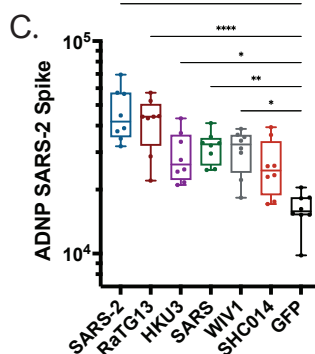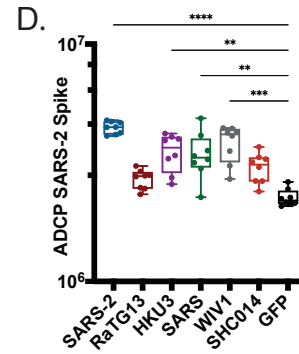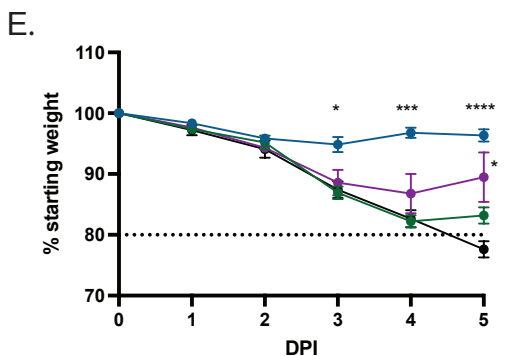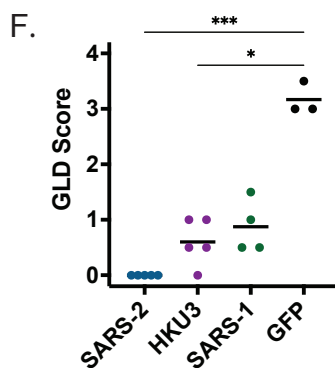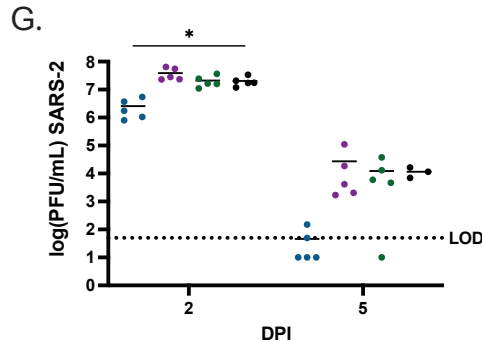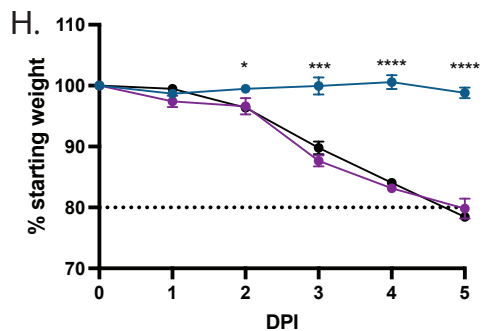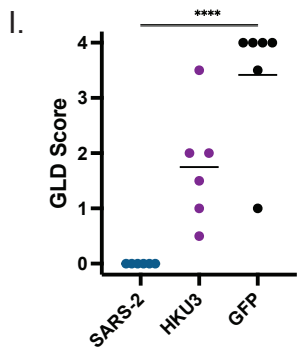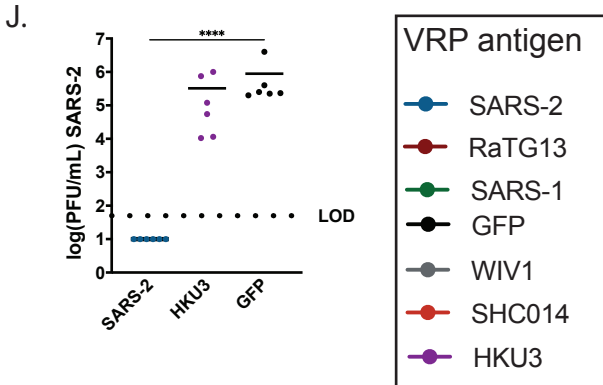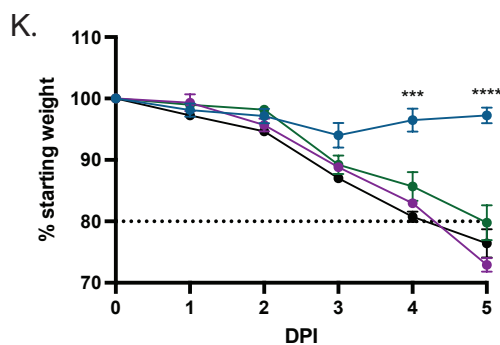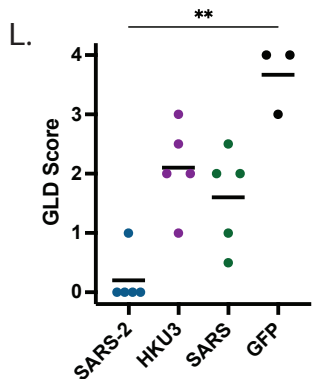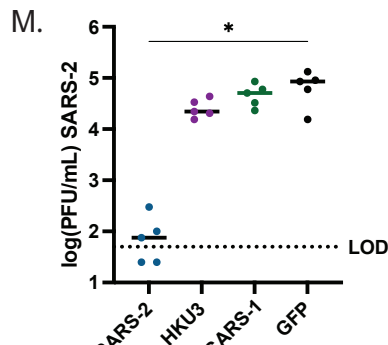

Source: http://biorxiv.org/content/10.1101/2022.11.28.518175v1.full.pdf
